# Supplementary material for: Effective Halogen-Free Flame-Retardant Additives for Crosslinked Rigid Polyisocyanurate Foams: Comparison of Chemical Structures
Source: MDPI journal article supplement (doi:10.3390/ma16010172), 2022-12-24
Supplement: s1 [file s1]

# Effective halogen-free flame retardant additives for crosslinked rigid polyisocyanurate foams: comparison of chemical structures

Johannes Lenz <sup>1</sup>, Doris Pospiech <sup>1,\*</sup>, Hartmut Komber <sup>1</sup>, Andreas Korwitz <sup>1</sup>, Oliver Kobsch <sup>1</sup>,  
Maxime Paven <sup>2</sup>, Rolf W. Albach <sup>2</sup>, Martin Günther <sup>3</sup>, Bernhard Schartel <sup>3</sup>

<sup>1</sup> Leibniz-Institut für Polymerforschung Dresden e.V., Hohe Str. 6, 01069 Dresden, Germany

<sup>2</sup> Covestro Deutschland AG, 51365 Leverkusen, Germany

<sup>3</sup> Bundesanstalt für Materialforschung und-prüfung (BAM), 12205 Berlin, Germany

\* Correspondence [pospiech@ipfdd.de](mailto:pospiech@ipfdd.de); Tel.: (+49-351-4658497)

## Supplementary Materials

### Content:

1. <sup>1</sup>H, <sup>13</sup>C and <sup>31</sup>P NMR data of phospho-aldol adducts
2. <sup>1</sup>H, <sup>13</sup>C and <sup>31</sup>P NMR spectra of phospho-aldol adducts
3. PIR foam compositions studied
4. Compression strength of PIR foams with phospho-aldol adducts
5. Thermal decomposition of the PIR foams studied by TGA and Py-GC/MS
6. Cone calorimeter results: MARHE vs. char plots

## 1. $^1\text{H}$ , $^{13}\text{C}$ and $^{31}\text{P}$ NMR data

### FA-BPPO

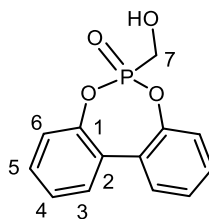

**Figure S1.** Chemical structure of FA-BPPO.

$^1\text{H}$  NMR (500 MHz, DMSO- $d_6$ ):  $\delta$  7.67 (d,  $J$  = 7.8 Hz, 2H; 3), 7.54 (t,  $J$  = 7.8 Hz, 2H; 5), 7.45 (t,  $J$  = 7.5 Hz, 2H; 4), 7.37 (d,  $J$  = 8.1 Hz, 2H; 6), 5.79 (m,  $^3J_{\text{HH}}$  = 5.8 Hz,  $^3J_{\text{PH}}$  = 8.6 Hz, 1H; OH), 4.09 ppm (m,  $^3J_{\text{HH}}$  = 5.8 Hz,  $^2J_{\text{PH}}$  = 4.9 Hz, 2H; 7).  $^{13}\text{C}$  NMR (125 MHz, DMSO- $d_6$ ):  $\delta$  147.6 (d,  $^2J_{\text{PC}}$  = 10.5 Hz; 1), 130.3 (3 and 5), 128.1 (2), 126.6 (4), 121.7 (d,  $^3J_{\text{PC}}$  = 3.7 Hz; 6), 54.6 ppm (d,  $^1J_{\text{PC}}$  = 156 Hz; 7).  $^{31}\text{P}$  NMR (202 MHz, DMSO- $d_6$ ):  $\delta$  33.7 ppm.

### AA-BPPO

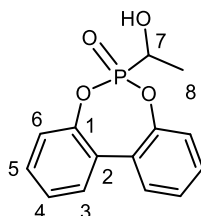

**Figure S2.** Chemical structure of AA-BPPO.

$^1\text{H}$  NMR (500 MHz, DMSO- $d_6$ ):  $\delta$  7.65 (2H; 3), 7.52 (2H; 5), 7.43 (2H; 4), 7.37 (2H; 6), 5.91 (dd,  $^3J_{\text{HH}}$  = 6.6 Hz,  $^3J_{\text{PH}}$  = 8.5 Hz, 1H; OH), 4.25 (m,  $^3J_{\text{HH}}$  = 6.8 Hz,  $^2J_{\text{PH}}$  = 2.9 Hz, 1H; 7), 1.46 ppm (dd,  $^3J_{\text{HH}}$  = 7.0 Hz,  $^3J_{\text{PH}}$  = 18.7 Hz, 3H; 8).  $^{13}\text{C}$  NMR (125 MHz, DMSO- $d_6$ ):  $\delta$  147.9 and 147.7 (2 x d,  $^2J_{\text{PC}}$  = 10.6 Hz; 1), 130.3 (two signals; 3), 130.2 (5), 128.0 (two signals; 2), 126.5 and 126.4 (4), 121.8 and 121.7 (2 x d,  $^3J_{\text{PC}}$  = 3.6 Hz; 6), 61.7 (d,  $^1J_{\text{PC}}$  = 155 Hz; 7), 17.8 ppm (8).  $^{31}\text{P}$  NMR (202 MHz, DMSO- $d_6$ ):  $\delta$  35.8 ppm. The chirality of  $\text{C}_7$  results in non-equivalence of the protons and carbons in the biphenyl moiety. The proton signals of  $\text{H}_3$  –  $\text{H}_6$  show a complex pattern.

### FU-BPPO

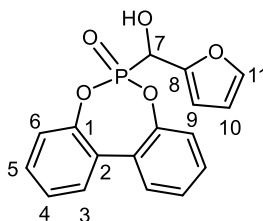

**Figure S3.** Chemical structure of FU-BPPO.

$^1\text{H}$  NMR (500 MHz, DMSO- $d_6$ ):  $\delta$  7.71 (s, 1H; 11), 7.66 (2H; 3), 7.52 (2H; 5), 7.44 (2H; 4), 7.38 and 7.26 (2 x d,  $J$  = 8.1 Hz, 2 x 1H; 6), 6.69 (dd,  $^3J_{\text{HH}}$  = 6.6 Hz,  $^3J_{\text{PH}}$  = 13.9 Hz, 1H; OH), 6.62 (m, 1H; 9), 6.50 (m, 1H; 10), 5.32 ppm (dd,  $^3J_{\text{HH}}$  = 6.6 Hz,  $^2J_{\text{PH}}$  = 12.9 Hz, 1H; 7).  $^{13}\text{C}$  NMR (125 MHz, DMSO- $d_6$ ):  $\delta$  149.6 (8), 148.0 and 147.5 (2 x d,  $^2J_{\text{PC}}$  = 10.5 Hz; 1), 143.7 (d,  $^4J_{\text{PH}}$  = 2.2 Hz; 11), 130.4 and 130.3 (3), 130.2 (5), 128.0 and 127.8 (2), 126.6 and 126.5 (4), 121.8 ( $^3J_{\text{PC}}$  = 3.6 Hz; 6), 110.9 (10), 110.2 (d,  $^3J_{\text{PC}}$  = 7.3 Hz; 9), 61.6 ppm (d,  $^1J_{\text{PC}}$  = 165 Hz; 7).  $^{31}\text{P}$  NMR (202 MHz, DMSO- $d_6$ ):  $\delta$  28.3 ppm.

The chirality of C<sub>7</sub> results in non-equivalence of the protons and carbons in the biphenyl moiety. The proton signals of H<sub>3</sub> – H<sub>6</sub> show a complex pattern.

#### BA-BPPO

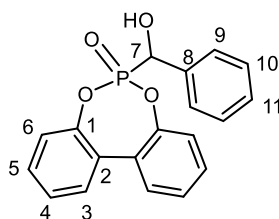

**Figure S4.** Chemical structure of BA-BPPO.

<sup>1</sup>H NMR (500 MHz, DMSO-d<sub>6</sub>): δ 7.65 (d, J = 7.7 Hz, 2H; 3), 7.6-7.48 (4H; 5, 9), 7.48-7.39 (4H; 4, 10), 7.39-7.3 (2H; 6<sub>A</sub>, 11), 7.25 (d, 8.1 Hz, 1H; 6<sub>B</sub>), 6.64 (dd, <sup>3</sup>J<sub>HH</sub> = 5.9 Hz, <sup>3</sup>J<sub>PH</sub> = 16.5 Hz, 1H; OH), 5.33 ppm (dd, <sup>3</sup>J<sub>HH</sub> = 5.9 Hz, <sup>2</sup>J<sub>PH</sub> = 11.3 Hz, 1H; 7). <sup>13</sup>C NMR (125 MHz, DMSO-d<sub>6</sub>): δ 148.2 and 147.7 (2 × d, <sup>2</sup>J<sub>PC</sub> = 10.4 Hz; 1), 136.7 (8), 130.4 (3), 130.3 and 130.2 (two signals; 5), 128.3 (10, 11), 128.0 and 127.9 (2), 127.7 (d, <sup>3</sup>J<sub>PC</sub> = 6.3 Hz; 9), 126.5 and 126.4 (4), 121.9 and 121.8 (2 × d, <sup>3</sup>J<sub>PC</sub> = 3.2 Hz; 6), 68.8 ppm (d, <sup>1</sup>J<sub>PC</sub> = 156 Hz; 7). <sup>31</sup>P NMR (202 MHz, DMSO-d<sub>6</sub>): δ 31.1 ppm. The chirality of C<sub>7</sub> results in non-equivalence of the protons and carbons in the biphenyl moiety. The proton signals of H<sub>3</sub> – H<sub>6</sub> show a complex pattern.

#### TA-BPPO

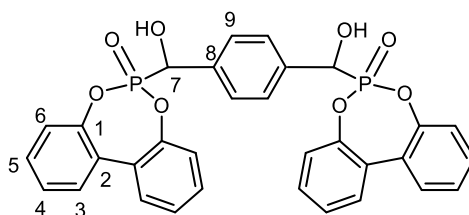

**Figure S5.** Chemical structure of TA-BPPO.

<sup>1</sup>H NMR (500 MHz, DMSO-d<sub>6</sub>): δ 7.67 (d, J = 7.7 Hz, 4H; 3), 7.61 (s, 4H; 9), 7.53 (4H; 5), 7.44 (4H; 4), 7.33 and 7.28 (2 × 1H; 6), 6.69 (dd, <sup>3</sup>J<sub>HH</sub> = 5.8 Hz, <sup>3</sup>J<sub>PH</sub> = 16.5 Hz, 2H; OH), 5.38 ppm (dd, <sup>3</sup>J<sub>HH</sub> = 5.8 Hz, <sup>2</sup>J<sub>PH</sub> = 2.3 Hz, 2H; 7). <sup>13</sup>C NMR (125 MHz, DMSO-d<sub>6</sub>): δ 148.2 and 147.6 (1), 136.7 (8), 130.3 (two signals; 3, 5), 128.0 and 127.9 (2), 127.7 (9), 126.6 and 126.5 (4), 121.9 and 121.8 (6), 68.6 ppm (d, <sup>1</sup>J<sub>PC</sub> = 156 Hz; 7). <sup>31</sup>P NMR (202 MHz, DMSO-d<sub>6</sub>): δ 31.0 ppm. The chirality of both C<sub>7</sub> atoms results in a pair of diastereomers (RR/SS and RS/SR). Therefore, an additional signal splitting is observed both in the <sup>1</sup>H and <sup>13</sup>C NMR spectrum.

#### FA-DOPO

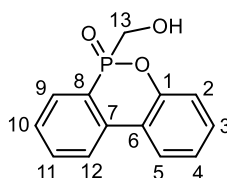

**Figure S6.** Chemical structure of FA-DOPO.

$^1\text{H}$  NMR (500 MHz, DMSO- $d_6$ ):  $\delta$  8.25 (dd,  $^4J_{\text{PH}} = 4.4$  Hz,  $^3J_{\text{HH}} = 7.8$  Hz, 1H; 12), 8.19 (d,  $^3J_{\text{HH}} = 8.0$  Hz, 1H; 5), 7.96 (dd,  $^3J_{\text{HH}} = 7.6$  Hz,  $^3J_{\text{PH}} = 12.7$  Hz, 1H; 9), 7.80 (t,  $^3J_{\text{HH}} = 7.8$  Hz, 1H; 11), 7.45 (dt,  $^4J_{\text{PH}} = 2.9$ ,  $^4J_{\text{PH}} = 7.3$  Hz, 1H; 10), 7.46 (t,  $^3J_{\text{HH}} = 7.6$  Hz, 1H; 3), 7.31 (t,  $^3J_{\text{HH}} = 7.8$  Hz, 1H; 4), 7.46 (d,  $^3J_{\text{HH}} = 8.2$  Hz, 1H; 2), 5.56 (dt,  $^3J_{\text{PH}} = 9.6$  Hz,  $^3J_{\text{HH}} = 6.0$  Hz, 1H; OH), 4.27 (dd,  $^2J_{\text{HH}} = 15.2$  Hz,  $^3J_{\text{HH}} = 6.0$  Hz, 1H; one H of 13), 4.06 ppm (m,  $^2J_{\text{HH}} = 15.2$  Hz,  $^3J_{\text{HH}} = 6.0$  Hz,  $^2J_{\text{PH}} = 8.2$  Hz, 1H; one H of 13).  $^{13}\text{C}$  NMR (125 MHz, DMSO- $d_6$ ):  $\delta$  149.1 (d,  $^2J_{\text{PC}} = 9.2$  Hz; 1), 135.3 (d,  $^2J_{\text{PC}} = 4.8$  Hz; 7), 133.4 (d,  $^4J_{\text{PC}} = 1.8$  Hz; 11), 130.7 (3), 130.5 (d,  $^2J_{\text{PC}} = 12.2$  Hz; 9), 128.6 (d,  $^2J_{\text{PC}} = 13.1$  Hz; 10), 125.6 (5), 124.5 (4), 124.0 (d,  $^3J_{\text{PC}} = 8.8$  Hz; 12), 123.2 (d,  $^1J_{\text{PC}} = 114.1$  Hz; 8), 121.4 (d,  $^3J_{\text{PC}} = 10.4$  Hz; 6), 120.0 (d,  $^3J_{\text{PC}} = 5.8$  Hz; 2), 57.8 ppm (d,  $^1J_{\text{PC}} = 118.2$  Hz; 13).  $^{31}\text{P}$  NMR (202 MHz, DMSO- $d_6$ ):  $\delta$  33.4 ppm.

## AA-DOPO

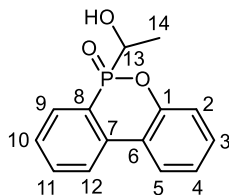

**Figure S7.** Chemical structure of AA-DOPO.

$^1\text{H}$  NMR (500 MHz, DMSO- $d_6$ ):  $\delta$  8.22 (1H; 12), 8.16 (1H; 5), 7.93 (dd,  $^3J_{\text{HH}} = 7.6$  Hz,  $^3J_{\text{PH}} = 12.2$  Hz, 0.21H; 9<sub>mi</sub>), 7.90 (dd,  $^3J_{\text{HH}} = 7.6$  Hz,  $^3J_{\text{PH}} = 11.5$  Hz, 0.79H; 9<sub>ma</sub>), 7.80 (1H; 11), 7.60 (1H; 10), 7.43 (1H; 3), 7.33-7.22 (2H; 2,4), 5.61 (1H; OH), 4.35 (dq,  $^2J_{\text{PH}} = 13.3$  Hz,  $^3J_{\text{HH}} = 6.8$  Hz, 0.21H; 13<sub>mi</sub>), 4.10 (m, 0.45H; 13<sub>ma</sub>), 1.35 ppm (3H; 14).  $^{13}\text{C}$  NMR (125 MHz, DMSO- $d_6$ ):  $\delta$  149.7 (d,  $^2J_{\text{PC}} = 9.0$  Hz; 1<sub>ma</sub>), 149.5 (d,  $^2J_{\text{PC}} = 9.6$  Hz; 1<sub>mi</sub>), 135.8 (d,  $^2J_{\text{PC}} = 5.5$  Hz; 7<sub>ma</sub>), 135.7 (d,  $^2J_{\text{PC}} = 4.8$  Hz; 7<sub>mi</sub>), 133.6 (d,  $^4J_{\text{PC}} = 1.2$  Hz; 11<sub>ma</sub>), 133.3 (d,  $^4J_{\text{PC}} = 1.2$  Hz; 11<sub>mi</sub>), 131.4 (d,  $^2J_{\text{PC}} = 10.1$  Hz; 9<sub>ma</sub>), 130.7 (3<sub>ma</sub>), 130.65 (d,  $^2J_{\text{PC}} = 10.4$  Hz; 9<sub>mi</sub>), 130.6 (3<sub>mi</sub>), 128.5 (d,  $^3J_{\text{PC}} = 12.0$  Hz; 10<sub>mi</sub>), 128.4 (d,  $^3J_{\text{PC}} = 12.1$  Hz; 10<sub>ma</sub>), 125.6 (5<sub>ma</sub>), 125.3 (5<sub>mi</sub>), 124.4 (4<sub>ma</sub>), 124.3 (4<sub>mi</sub>), 124.0 (d,  $^3J_{\text{PC}} = 8.8$  Hz; 12<sub>ma</sub>), 123.8 (d,  $^3J_{\text{PC}} = 9.0$  Hz; 12<sub>mi</sub>), 122.9 (d,  $^1J_{\text{PC}} = 111.3$  Hz; 8<sub>mi</sub>), 122.7 (d,  $^1J_{\text{PC}} = 109.8$  Hz; 8<sub>ma</sub>), 121.7 (d,  $^3J_{\text{PC}} = 9.3$  Hz; 6<sub>ma</sub>), 121.4 (d,  $^3J_{\text{PC}} = 9.7$  Hz; 6<sub>mi</sub>), 119.9 (d,  $^2J_{\text{PC}} = 5.6$  Hz; 2<sub>mi</sub>), 119.7 (d,  $^2J_{\text{PC}} = 5.9$  Hz; 2<sub>ma</sub>), 65.0 (d,  $^1J_{\text{PC}} = 118.9$  Hz; 13<sub>ma</sub>), 64.1 (d,  $^1J_{\text{PC}} = 119.6$  Hz; 13<sub>mi</sub>), 16.9 (d,  $^2J_{\text{PC}} = 2.4$  Hz; 14<sub>ma</sub>), 16.5 ppm (14<sub>mi</sub>).  $^{31}\text{P}$  NMR (202 MHz, DMSO- $d_6$ ):  $\delta$  34.6 (P<sub>mi</sub>) and 34.2 ppm (P<sub>ma</sub>).

Note: The chirality of both the phosphorous atom and methine carbon C<sub>13</sub> results in two diastereomers with overlapping signals both in the  $^1\text{H}$  and  $^{13}\text{C}$  NMR spectrum. The molar ratio of major (ma) to minor (mi) isomer is 79 : 21.

## FU-DOPO

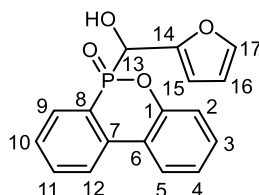

**Figure S8.** Chemical structure of FU-DOPO.

$^1\text{H}$  NMR (500 MHz, DMSO- $d_6$ ):  $\delta$  8.22 (1H; 12), 8.15 (1H; 5), 7.93 (dd,  $^3J_{\text{HH}} = 7.6$  Hz,  $^3J_{\text{PH}} = 12.5$  Hz, 0.55H; 9<sub>ma</sub>), 7.80 (1H; 11), 7.75 (dd,  $^3J_{\text{HH}} = 7.7$  Hz,  $^3J_{\text{PH}} = 12.3$  Hz, 0.45H; 9<sub>mi</sub>), 7.65-7.55 (1.45H; 10,17<sub>mi</sub>), 7.54 (s, 0.55H; 17<sub>ma</sub>), 7.43 (1H; 3), 7.30-7.18 (2H; 2,4), 6.48-6.32 (3H; 15,16,OH), 5.30 (dd,  $^2J_{\text{PH}} = 9.2$  Hz,  $^3J_{\text{HH}} = 6.2$  Hz, 0.55H; 13<sub>ma</sub>), 4.06 ppm (dd,  $^2J_{\text{PH}} = 12.3$  Hz,  $^3J_{\text{HH}} = 6.2$  Hz, 0.45H; 13<sub>mi</sub>).  $^{13}\text{C}$  NMR (125 MHz, DMSO- $d_6$ ):  $\delta$  150.2 (14), 149.8 (d,  $^2J_{\text{PC}} = 9.0$  Hz; 1<sub>mi</sub>), 149.7 (d,  $^2J_{\text{PC}} = 9.4$  Hz; 1<sub>ma</sub>), 143.2 (d,  $^5J_{\text{PC}} = 2.2$  Hz; 17<sub>mi</sub>), 143.1 (d,  $^5J_{\text{PC}} = 2.2$  Hz; 17<sub>ma</sub>), 136.1 (d,  $^2J_{\text{PC}} = 6.0$  Hz; 7<sub>mi</sub>), 136.0 (d,  $^2J_{\text{PC}} = 5.5$  Hz; 7<sub>ma</sub>), 133.8 (d,  $^4J_{\text{PC}} = 1.5$  Hz; 11<sub>mi</sub>), 133.7 (d,  $^4J_{\text{PC}} = 1.5$  Hz; 11<sub>ma</sub>), 131.6 (d,  $^2J_{\text{PC}} = 10.4$  Hz; 9<sub>mi</sub>), 131.1 (d,  $^2J_{\text{PC}} = 10.4$  Hz; 9<sub>ma</sub>), 130.7 (3<sub>mi</sub>), 130.6 (3<sub>ma</sub>), 128.5 (d,  $^3J_{\text{PC}} = 12.6$  Hz; 10<sub>ma</sub>), 128.3 (d,  $^3J_{\text{PC}} = 12.6$  Hz; 10<sub>mi</sub>), 125.5 (5<sub>mi</sub>), 125.4

(5<sub>ma</sub>), 124.5 (4<sub>mi</sub>), 124.3 (4<sub>ma</sub>), 123.9 (d,  $^3J_{PC} = 9.3$  Hz; 12<sub>mi</sub>), 123.7 (d,  $^3J_{PC} = 9.3$  Hz; 12<sub>ma</sub>), 122.5 (d,  $^1J_{PC} = 114.9$  Hz; 8<sub>ma</sub>), 122.2 (d,  $^1J_{PC} = 114.9$  Hz; 8<sub>mi</sub>), 121.5 (d,  $^3J_{PC} = 9.8$  Hz; 6<sub>mi</sub>), 121.3 (d,  $^3J_{PC} = 9.8$  Hz; 6<sub>ma</sub>), 119.7 (2), 110.7 (16), 109.6 (d,  $^3J_{PC} = 6.1$  Hz; 15<sub>ma</sub>), 109.3 (d,  $^3J_{PC} = 6.7$  Hz; 15<sub>mi</sub>), 66.5 (d,  $^1J_{PC} = 122.3$  Hz; 8<sub>mi</sub>), 65.7 ppm (d,  $^1J_{PC} = 122.3$  Hz; 8<sub>ma</sub>).  $^{31}\text{P}$  NMR (202 MHz, DMSO- $d_6$ ):  $\delta$  29.2 (P<sub>mi</sub>) and 29.1 ppm (P<sub>ma</sub>).

Note: The chirality of both the phosphorous atom and methine carbon C<sub>13</sub> results in two diastereomers with overlapping signals both in the  $^1\text{H}$  and  $^{13}\text{C}$  NMR spectrum. The molar ratio of major (ma) to minor (mi) isomer is 55 : 45.

### BA-DOPO

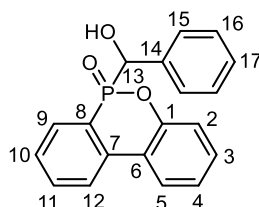

**Figure S9.** Chemical structure of BA-DOPO.

$^1\text{H}$  NMR (500 MHz, DMSO- $d_6$ ):  $\delta$  8.20 (1H; 12), 8.15 (d,  $^3J_{HH} = 7.8$  Hz, 0.48H; 5<sub>mi</sub>), 8.10 (d,  $^3J_{HH} = 7.8$  Hz, 0.52H; 5<sub>ma</sub>), 7.96 (dd,  $^3J_{PH} = 12.2$  Hz,  $^3J_{HH} = 7.5$  Hz, 0.52H; 9<sub>ma</sub>), 7.77 (1H; 11), 7.60 (dd,  $^3J_{HH} = 7.4$  Hz,  $^4J_{PH} = 2.0$  Hz, 0.52H; 10<sub>ma</sub>), 7.52-7.15 (8.44H; 2<sub>mi</sub>, 3, 4, 9<sub>mi</sub>, 10<sub>mi</sub>, 15, 16, 17), 7.12 (d,  $^3J_{HH} = 7.9$  Hz, 0.52H; 2<sub>ma</sub>), 6.39 (dd,  $^3J_{PH} = 17.3$  Hz,  $^3J_{HH} = 6.0$  Hz, 0.48H; OH<sub>mi</sub>), 6.30 (dd,  $^3J_{PH} = 16.9$  Hz,  $^3J_{HH} = 5.5$  Hz, 0.52H; OH<sub>ma</sub>), 5.33 (m, 0.52H; 13<sub>ma</sub>), 5.16 ppm (dd,  $^3J_{PH} = 12.0$  Hz,  $^3J_{HH} = 6.0$  Hz, 0.48H; 13<sub>mi</sub>).  $^{13}\text{C}$  NMR (125 MHz, DMSO- $d_6$ ):  $\delta$  150.2 (2 x d,  $^2J_{PC} = 9.2$  Hz; 1), 137.0 (14<sub>mi</sub>), 136.9 (d,  $^2J_{PC} = 2.5$  Hz; 14<sub>ma</sub>), 136.1 (7), 133.7 (d,  $^4J_{PC} = 2.5$  Hz; 11<sub>mi</sub>), 133.5 (d,  $^4J_{PC} = 2.0$  Hz; 11<sub>ma</sub>), 131.7 (d,  $^2J_{PC} = 9.2$  Hz; 9<sub>mi</sub>), 131.0 (d,  $^2J_{PC} = 10.6$  Hz; 9<sub>ma</sub>), 130.7 (3<sub>mi</sub>), 130.5 (3<sub>ma</sub>), 128.4 (d,  $^3J_{PC} = 12.7$  Hz; 10<sub>ma</sub>), 128.0 (d,  $^3J_{PC} = 12.2$  Hz; 10<sub>mi</sub>), 127.8-127.0 (several signals; 15, 16, 17), 125.5 (5<sub>mi</sub>), 125.3 (5<sub>ma</sub>), 124.3 (4<sub>mi</sub>), 124.1 (4<sub>ma</sub>), 123.8 (d,  $^3J_{PC} = 9.1$  Hz; 12<sub>mi</sub>), 123.5 (d,  $^3J_{PC} = 9.1$  Hz; 12<sub>ma</sub>), 122.8 (d,  $^1J_{PC} = 112.8$  Hz; 8<sub>ma</sub>), 122.1 (d,  $^1J_{PC} = 122.1$  Hz; 8<sub>mi</sub>), 121.6 (d,  $^3J_{PC} = 9.2$  Hz; 6<sub>mi</sub>), 121.3 (d,  $^3J_{PC} = 9.2$  Hz; 6<sub>ma</sub>), 119.7 (d,  $^2J_{PC} = 6.2$  Hz; 2<sub>mi</sub>), 119.5 (d,  $^2J_{PC} = 6.2$  Hz; 2<sub>ma</sub>), 71.9 (d,  $^1J_{PC} = 116.0$  Hz; 13<sub>mi</sub>), 71.7 ppm (d,  $^1J_{PC} = 116.0$  Hz; 13<sub>ma</sub>).  $^{31}\text{P}$  NMR (202 MHz, DMSO- $d_6$ ):  $\delta$  31.0 and 30.9 ppm.

Note: The chirality of both the phosphorous atom and methine carbon C<sub>13</sub> results in two diastereomers with overlapping signals both in the  $^1\text{H}$  and  $^{13}\text{C}$  NMR spectrum. The molar ratio of major (ma) to minor (mi) isomer is 52 : 48.

### TA-DOPO

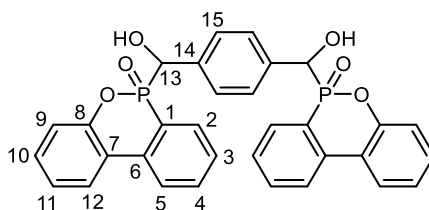

**Figure S10.** Chemical structure of TA-DOPO.

$^1\text{H}$  NMR (500 MHz, DMSO- $d_6$ ):  $\delta$  8.28-8.20 (2H; 12), 8.20-8.12 (2H; 5), 8.02-7.93 (1.1H; 9<sub>A</sub>), 7.85-7.75 (2H; 11), 7.65-7.55 (1.1H; 10<sub>A</sub>), 7.50-7.34 (6H; 9<sub>B</sub>, 10<sub>B</sub>, 11, 15<sub>A</sub>), 7.34-7.24 (5.8H; 2, 4, 15<sub>B</sub>), 6.45-6.20 (2H; OH), 5.39-5.31 (1.1H; 13<sub>A</sub>), 5.22-5.10 ppm (0.9H; 13<sub>B</sub>).  $^{13}\text{C}$  NMR (125 MHz, DMSO- $d_6$ ):  $\delta$  150.1 (1), 136.7-136.2 (14), 136.1 (7), 133.7 (11<sub>B</sub>), 133.5 (11<sub>A</sub>), 131.7 (9<sub>B</sub>), 130.9 (9<sub>A</sub>), 130.7 (3<sub>B</sub>), 130.6 (3<sub>A</sub>), 128.5 (10<sub>A</sub>), 128.0 (10<sub>B</sub>), 127.0 (15<sub>A</sub>), 126.6 (15<sub>B</sub>), 125.6 (5<sub>B</sub>), 125.4 (5<sub>A</sub>), 124.4 (4<sub>B</sub>), 124.2 (4<sub>A</sub>), 124.0-123.5 (12), 123.5-121.5 (d, 8), 121.5-121.0 (6), 119.8-119.4 (2), 72.3-71.3 ppm (d, 13).  $^{31}\text{P}$  NMR (202 MHz, DMSO- $d_6$ ):  $\delta$  31.0-30.2 ppm.

Note: The chirality of both phosphorous atoms and both methine carbon C<sub>13</sub> results in several diastereomers with overlapping signals both in the <sup>1</sup>H and <sup>13</sup>C NMR spectrum.

#### FU-EP

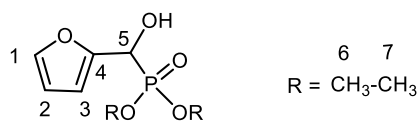

**Figure S11.** Chemical structure of FU-EP.

<sup>1</sup>H NMR (500 MHz, DMSO-d<sub>6</sub>): δ 7.64 (s, 1H; 1), 6.44 (2H; 2,3), 6.19 (dd, <sup>3</sup>J<sub>HH</sub> = 6.5 Hz, <sup>3</sup>J<sub>PH</sub> = 13.3 Hz, 1H; OH), 4.91 (dd, <sup>3</sup>J<sub>HH</sub> = 6.5 Hz, <sup>2</sup>J<sub>PH</sub> = 14.7 Hz, 1H; 5), 4.1-3.9 (4H; 6), 1.22 and 1.17 ppm (2 x t, <sup>3</sup>J<sub>HH</sub> = 7.7 Hz, 2 x 3H; 7). <sup>13</sup>C NMR (125 MHz, DMSO-d<sub>6</sub>): δ 151.5 (4), 142.7 (d, <sup>4</sup>J<sub>PC</sub> = 2.2 Hz; 1), 110.7 (2), 108.7 (d, <sup>3</sup>J<sub>PC</sub> = 6.4 Hz; 3), 63.4 (d, <sup>1</sup>J<sub>PC</sub> = 170 Hz; 5), 62.4 and 62.1 (2 x d, <sup>2</sup>J<sub>PC</sub> = 6.5 Hz; 6), 16.4 and 16.3 ppm (2 x d, <sup>3</sup>J<sub>PC</sub> = 11.5 Hz; 7). <sup>31</sup>P NMR (202 MHz, DMSO-d<sub>6</sub>): δ 19.6 ppm.

Note: The chirality of C<sub>5</sub> results in non-equivalence of the protons and carbons in the ethylester groups. The proton signals of H<sub>6</sub> show a complex pattern.

#### FU-BP

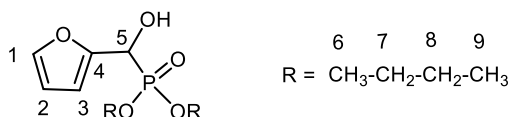

**Figure S12.** Chemical structure of FU-BP.

<sup>1</sup>H NMR (500 MHz, DMSO-d<sub>6</sub>): δ 7.63 (s, 1H; 1), 6.5-6.4 (2H; 2,3), 6.18 (dd, <sup>3</sup>J<sub>HH</sub> = 6.5 Hz, <sup>3</sup>J<sub>PH</sub> = 13.6 Hz, 1H; OH), 4.91 (dd, <sup>3</sup>J<sub>HH</sub> = 6.5 Hz, <sup>2</sup>J<sub>PH</sub> = 14.8 Hz, 1H; 5), 4.05-3.85 (4H; 6), 1.6-1.45 (4H; 7), 1.4-1.2 (4H; 8), 0.88 and 0.85 ppm (2 x t, <sup>3</sup>J<sub>HH</sub> = 7.4 Hz, 2 x 3H; 9). <sup>13</sup>C NMR (125 MHz, DMSO-d<sub>6</sub>): δ 151.6 (4), 142.7 (d, <sup>4</sup>J<sub>PC</sub> = 2.2 Hz; 1), 110.6 (2), 108.7 (d, <sup>3</sup>J<sub>PC</sub> = 6.1 Hz; 3), 65.9 and 65.6 (2 x d, <sup>2</sup>J<sub>PC</sub> = 7.0 Hz; 6), 63.4 (d, <sup>1</sup>J<sub>PC</sub> = 170 Hz; 5), 32.1 and 32.0 (2 x d, <sup>3</sup>J<sub>PC</sub> = 10.8 Hz; 7), 18.2 (8), 13.4 ppm (9). <sup>31</sup>P NMR (202 MHz, DMSO-d<sub>6</sub>): δ 19.6 ppm.

Note: The chirality of C<sub>5</sub> results in non-equivalence of the protons and carbons in the butylester groups. The proton signals of H<sub>6</sub>-H<sub>8</sub> show a complex pattern.

#### TA-BP

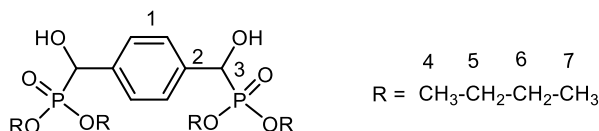

**Figure S13.** Chemical structure of TA-BP.

<sup>1</sup>H NMR (500 MHz, DMSO-d<sub>6</sub>): δ 7.63 (s, 4H; 1), 6.13 (dd, <sup>3</sup>J<sub>HH</sub> = 5.8 Hz, <sup>3</sup>J<sub>PH</sub> = 15.1 Hz, 2H; OH), 4.92 (dd, <sup>3</sup>J<sub>HH</sub> = 5.8 Hz, <sup>2</sup>J<sub>PH</sub> = 12.4 Hz, 2H; 3), 4.0-3.75 (8H; 4), 1.6-1.45 (8H; 5), 1.35-1.2 (8H; 6), 0.87 and 0.85 ppm (2 x t, <sup>3</sup>J<sub>HH</sub> = 7.1 Hz, 2 x 6H; 7). <sup>13</sup>C NMR (125 MHz, DMSO-d<sub>6</sub>): δ 137.7 (2), 126.7 (1), 69.3 and 69.2 (2 x d, <sup>1</sup>J<sub>PC</sub> = 163 Hz; 3), 65.7 and 65.4 (2 x m; 4), 32.1 (<sup>3</sup>J<sub>PC</sub> = 7.5 Hz; 5), 18.2 (6), 13.4 ppm (7). <sup>31</sup>P NMR (202 MHz, DMSO-d<sub>6</sub>): δ 21.6 ppm.

Note: The chirality of C<sub>3</sub> results in non-equivalence of the protons and carbons in the butylester groups. The proton signals of H<sub>4</sub>-H<sub>6</sub> show a complex pattern.

## 2. $^1\text{H}$ , $^{13}\text{C}$ and $^{31}\text{P}$ NMR spectra

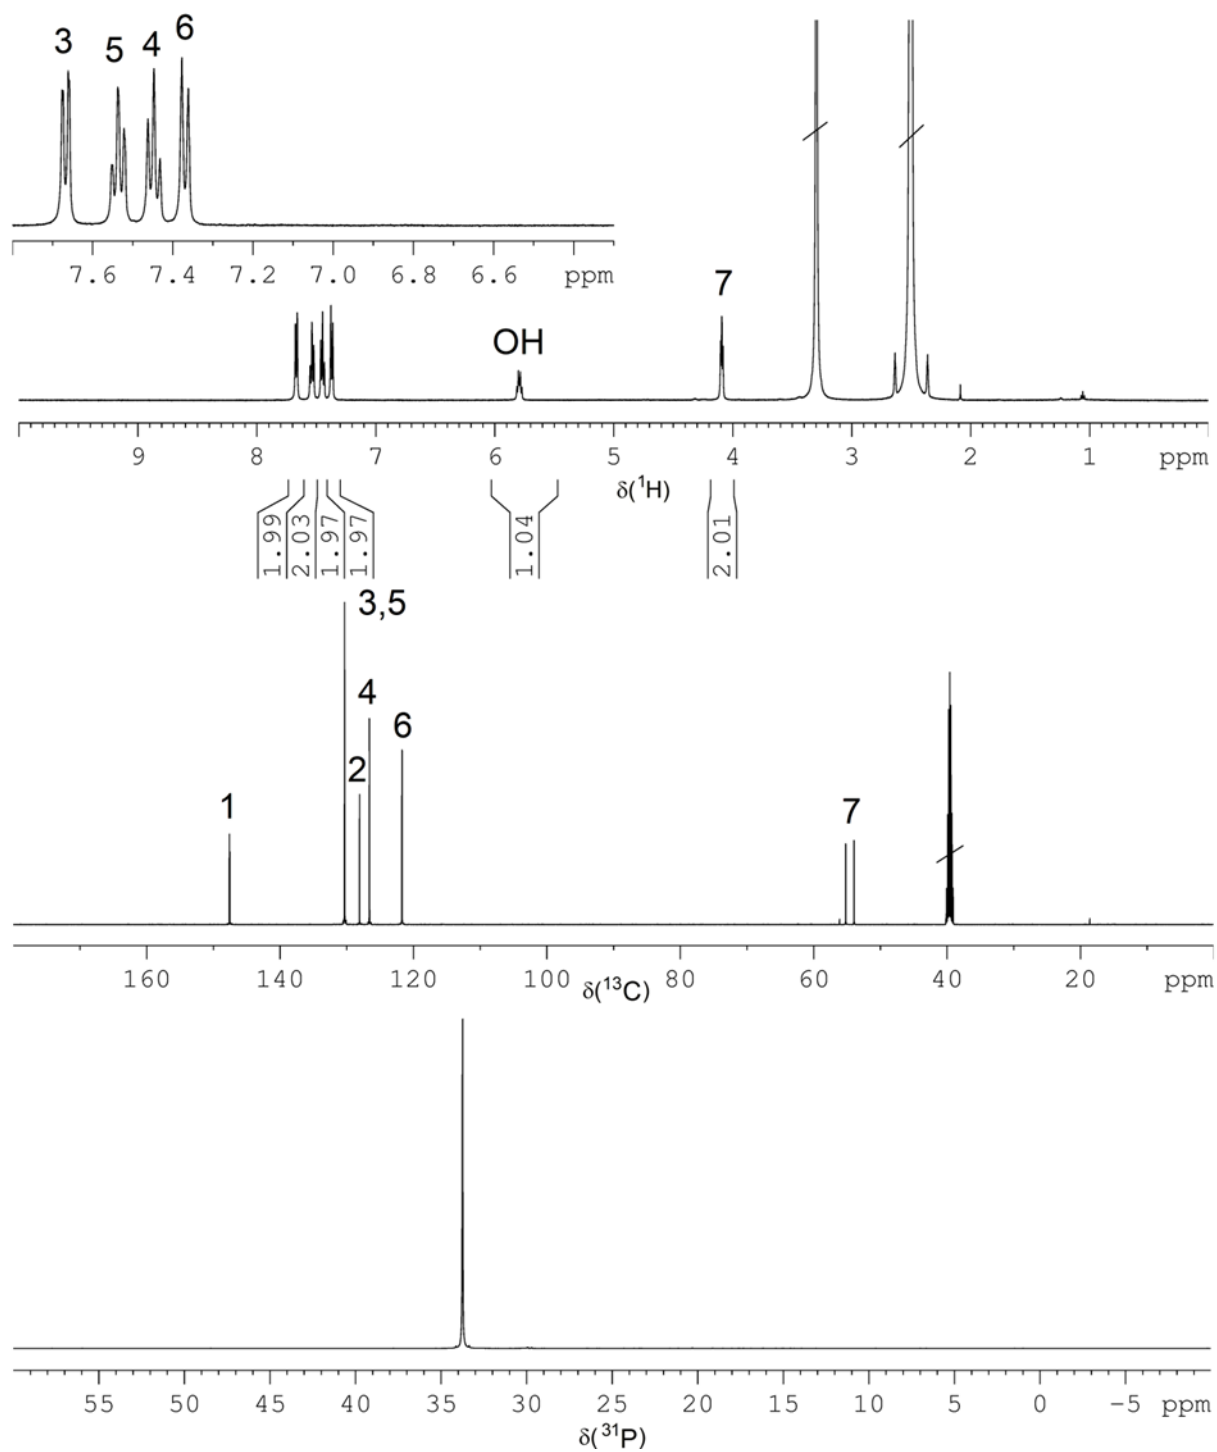

**Figure S14.**  $^1\text{H}$ ,  $^{13}\text{C}$  and  $^{31}\text{P}$  NMR spectrum of FA-BPPO (solvent: DMSO- $d_6$ ).

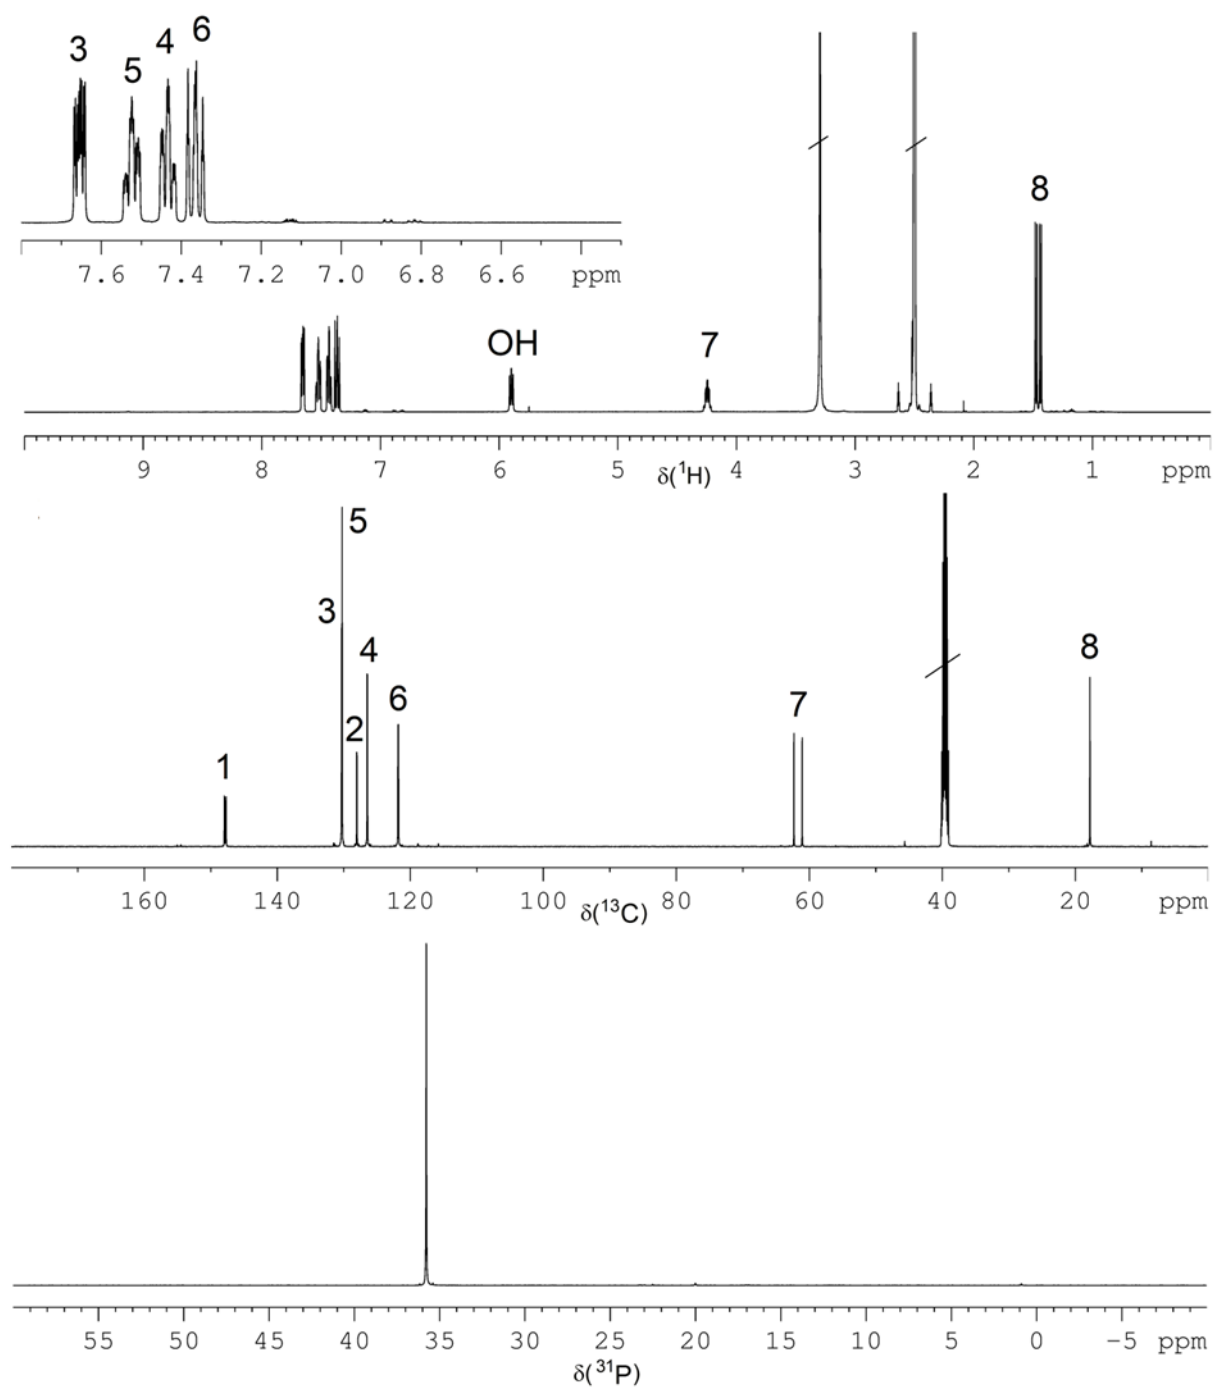

**Figure S15.** <sup>1</sup>H, <sup>13</sup>C and <sup>31</sup>P NMR spectrum of AA-BPPO (solvent: DMSO-d<sub>6</sub>).

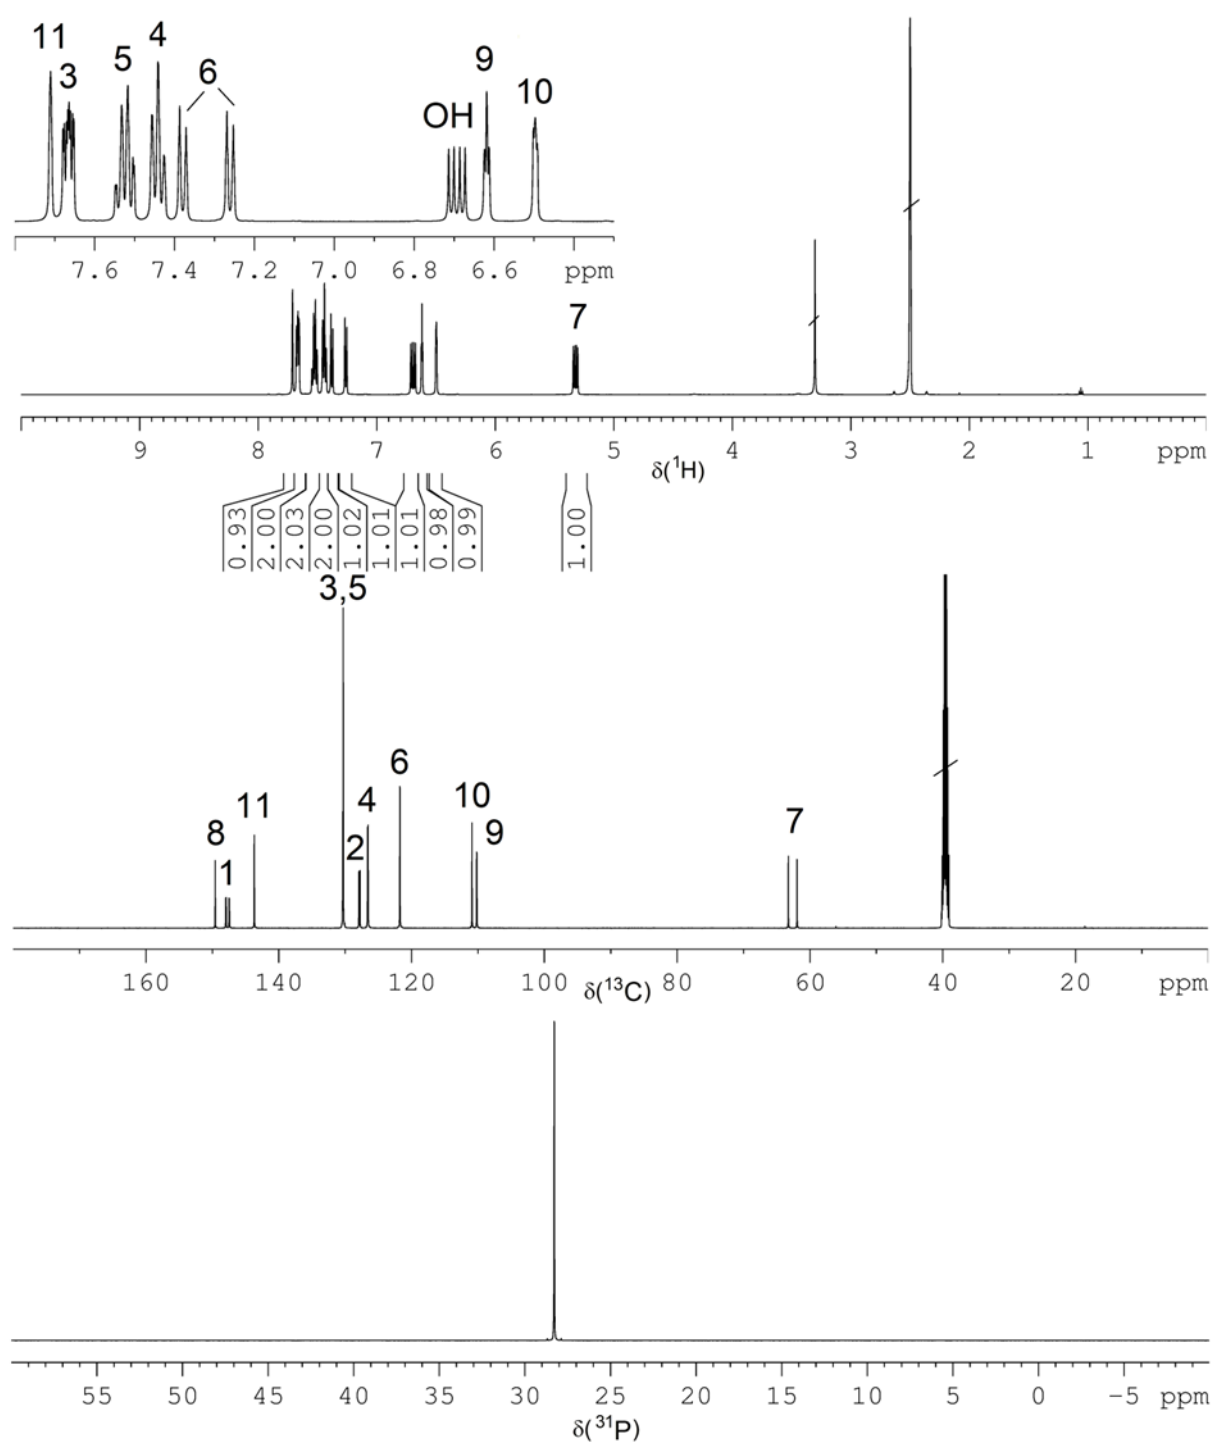

**Figure S16.** <sup>1</sup>H, <sup>13</sup>C and <sup>31</sup>P NMR spectrum of **FU-BPPO** (solvent: DMSO-d<sub>6</sub>).

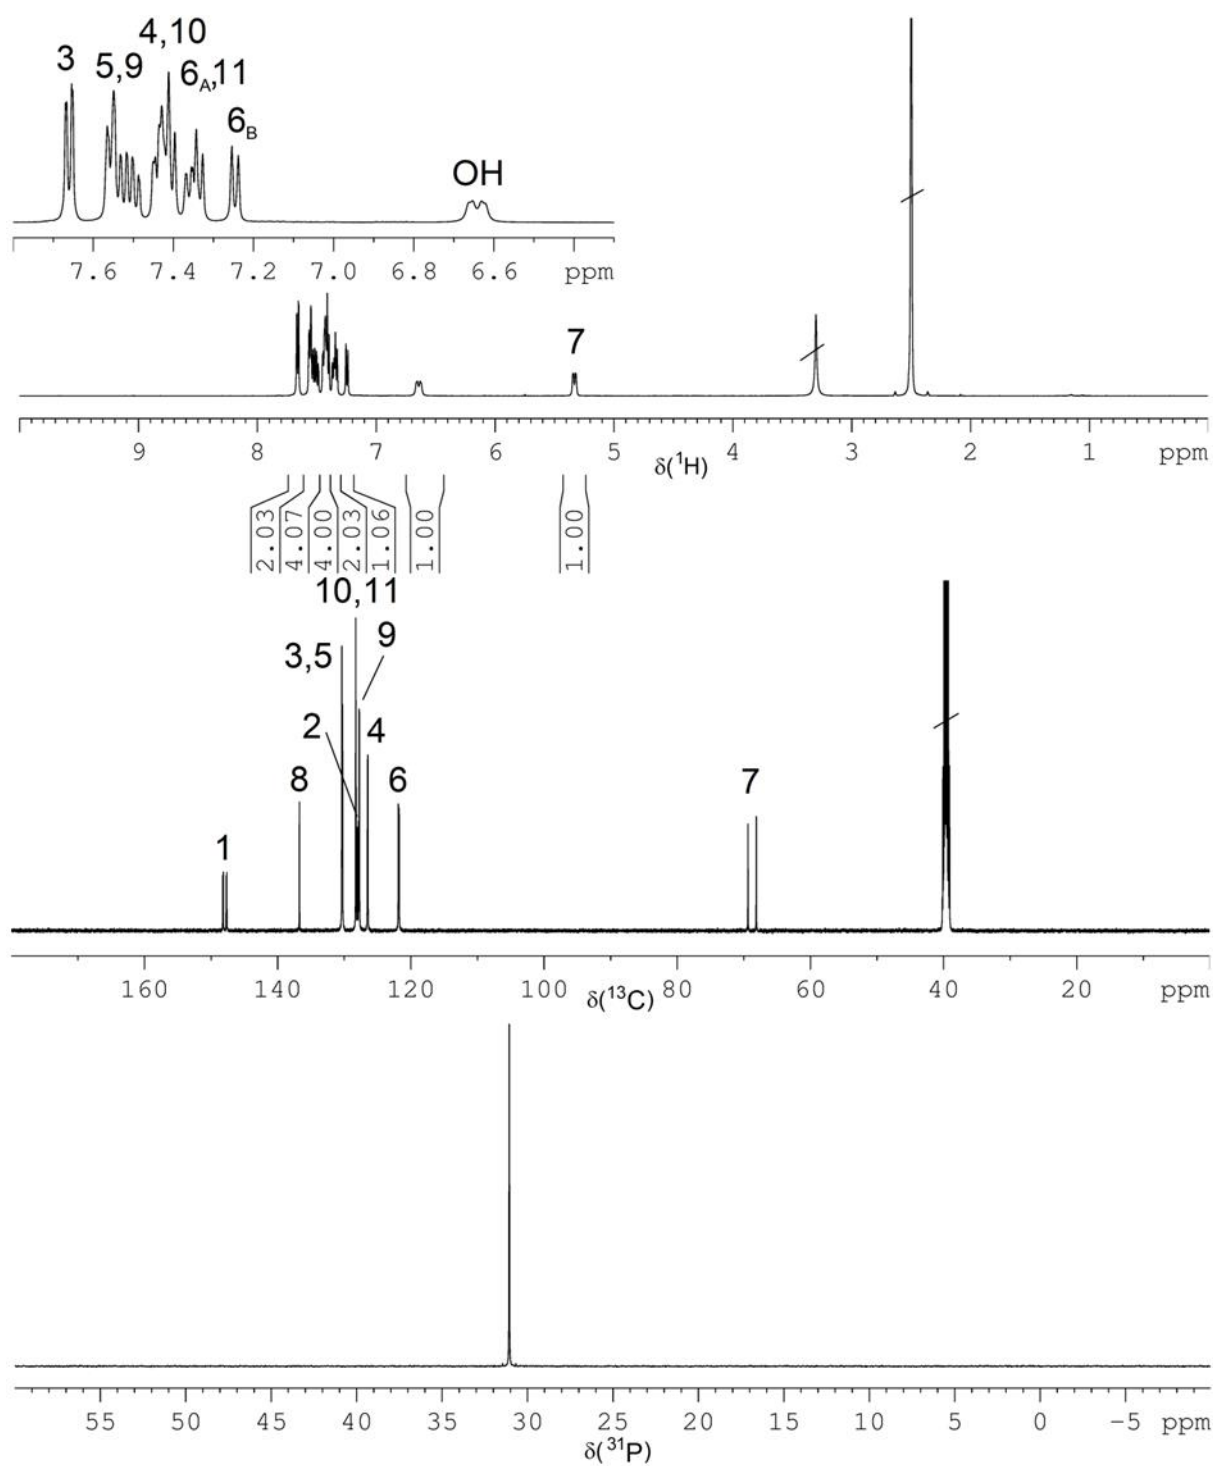

**Figure S17.** <sup>1</sup>H, <sup>13</sup>C and <sup>31</sup>P NMR spectrum of **BA-BPPO** (solvent: DMSO-d<sub>6</sub>).

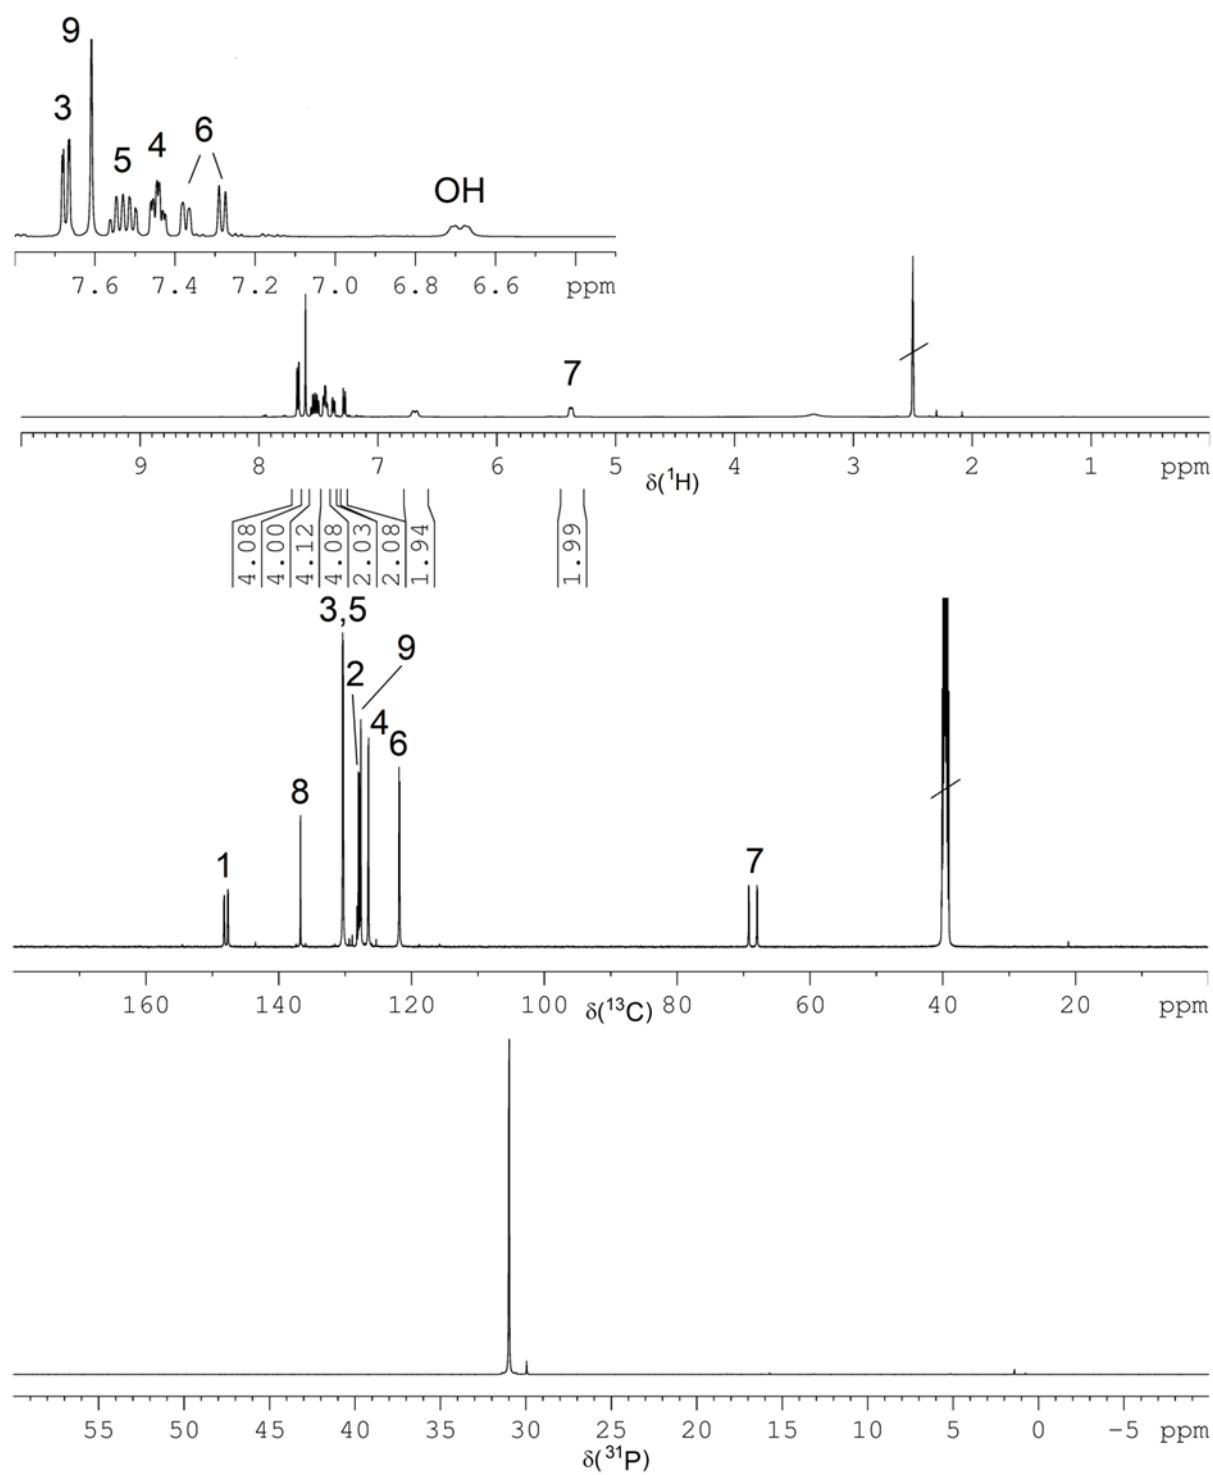

**Figure S18.** <sup>1</sup>H, <sup>13</sup>C and <sup>31</sup>P NMR spectrum of TA-BPPO (solvent: DMSO-d<sub>6</sub>).

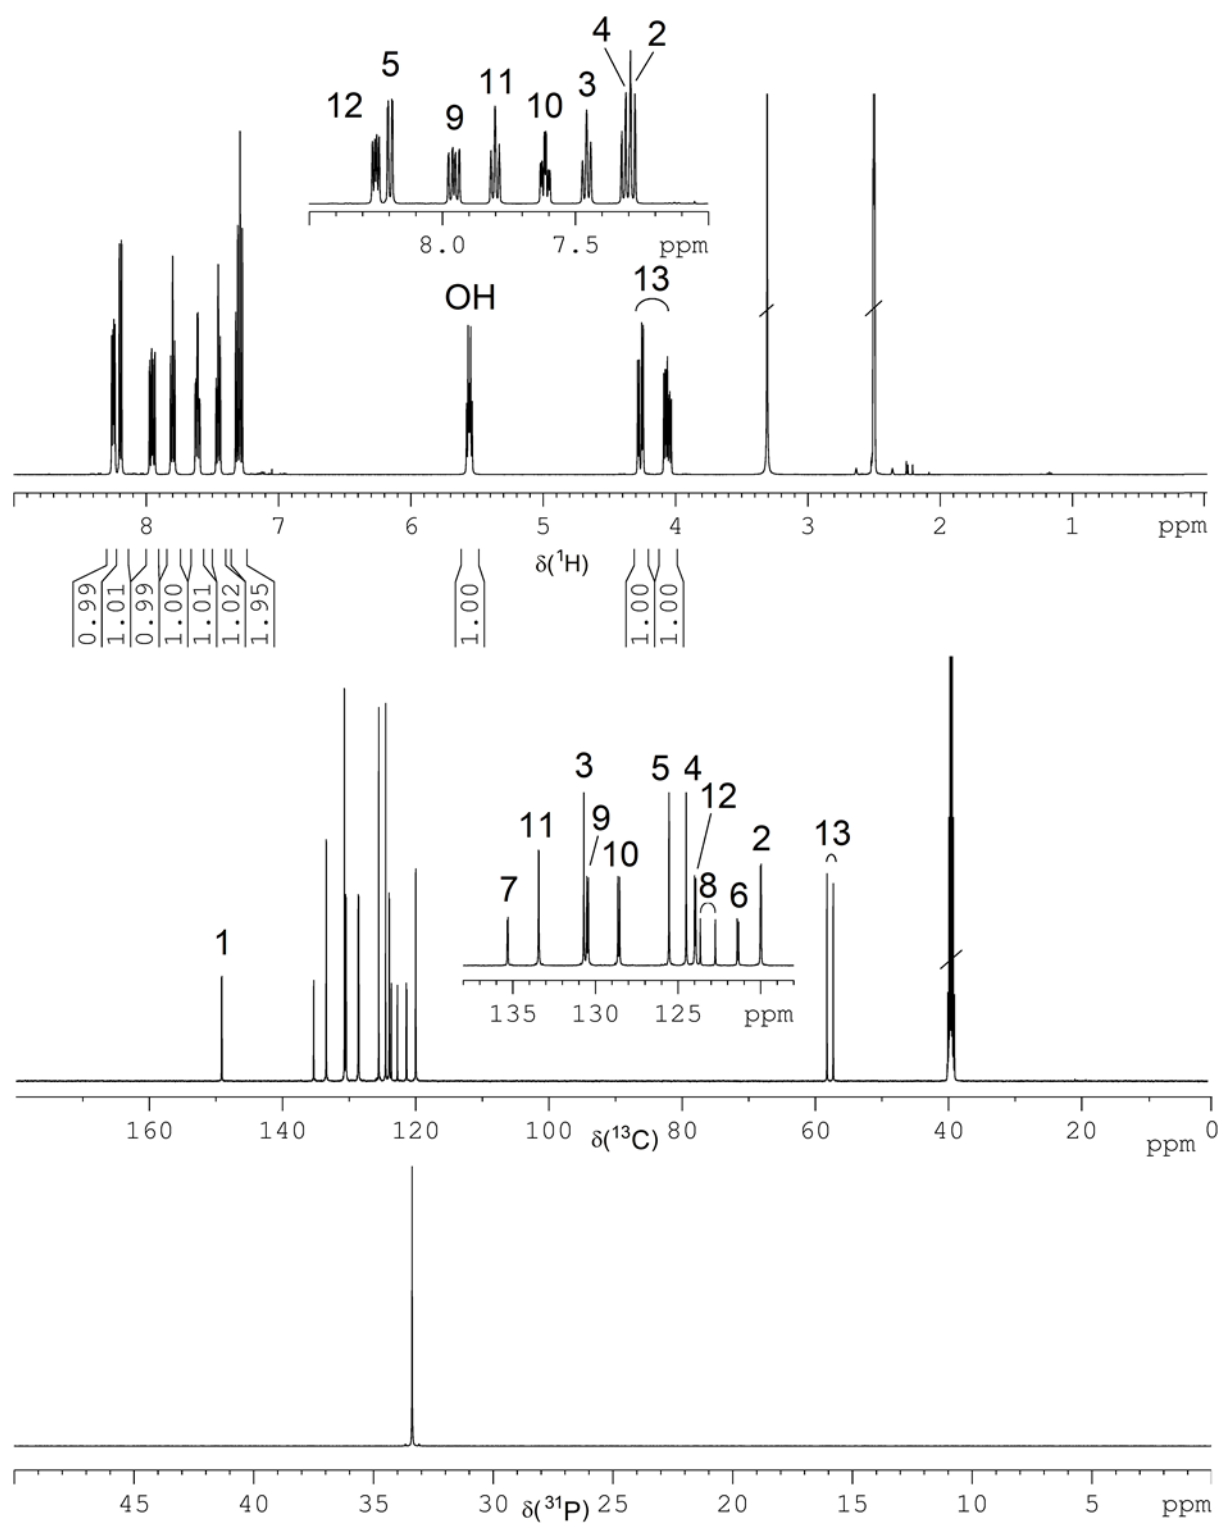

**Figure S19.** <sup>1</sup>H, <sup>13</sup>C and <sup>31</sup>P NMR spectrum of FA-DOPO (solvent: DMSO-d<sub>6</sub>).

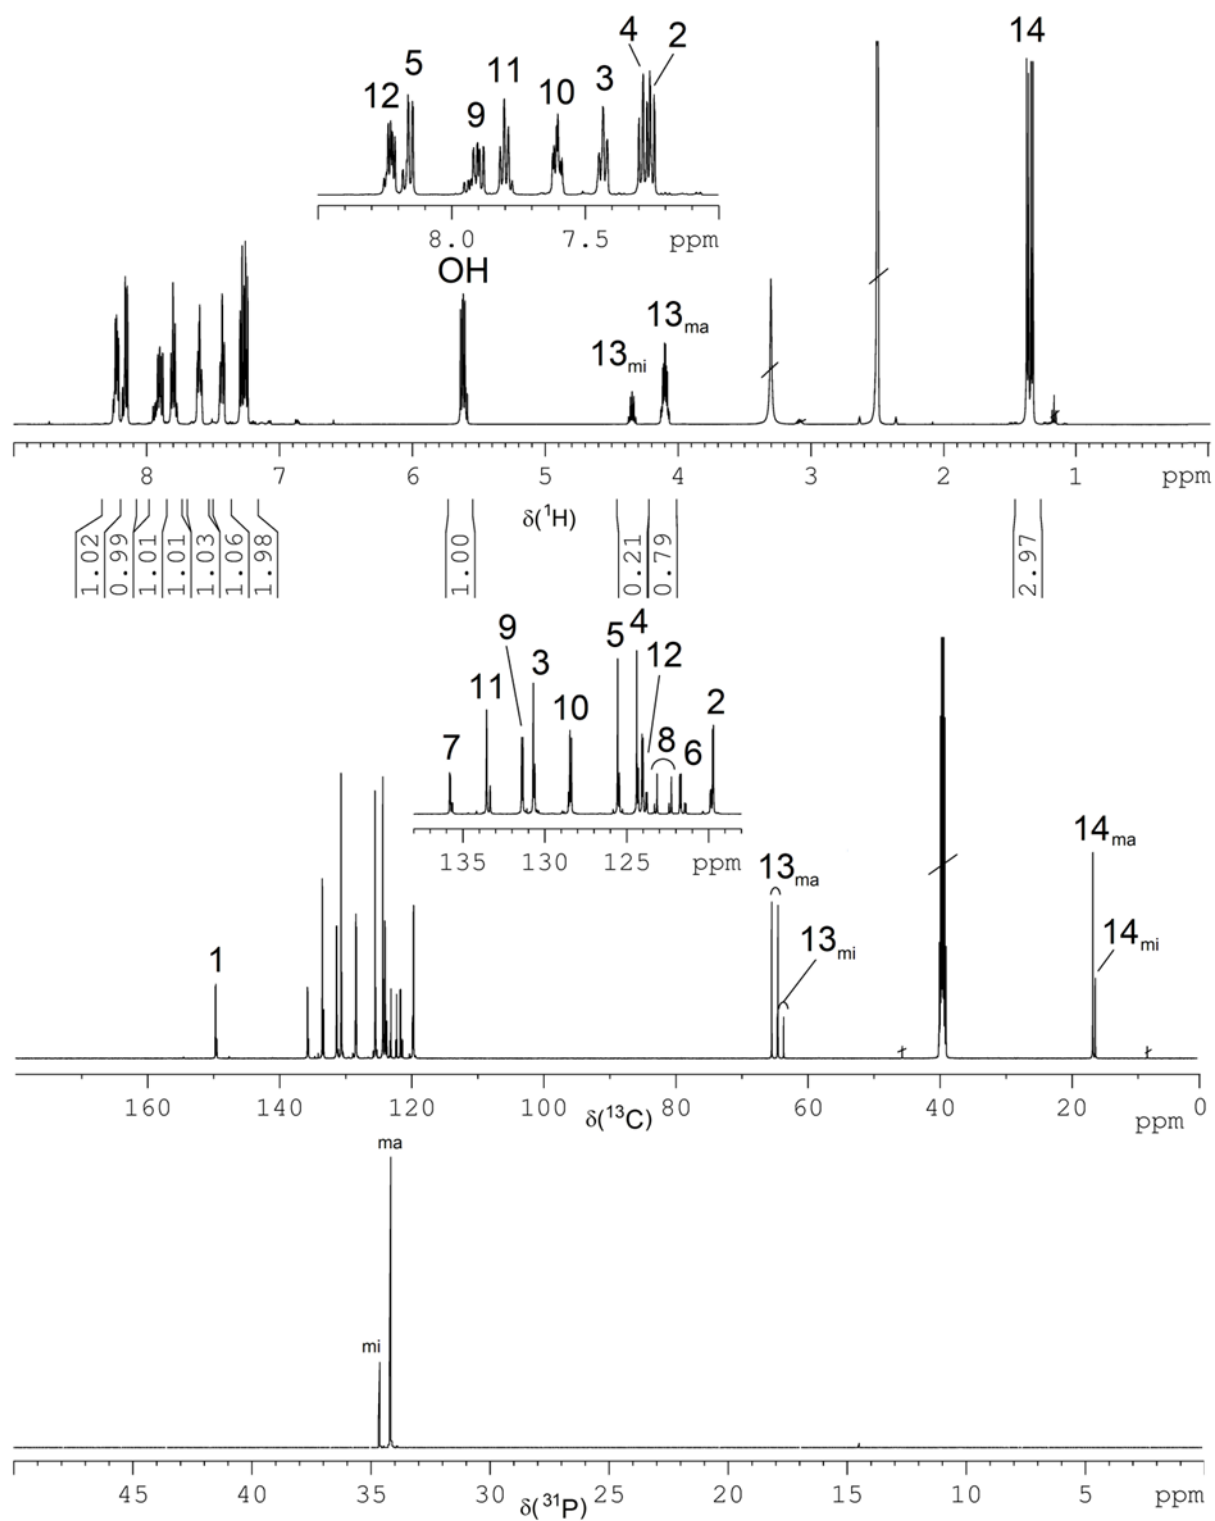

**Figure S20.**  $^1\text{H}$ ,  $^{13}\text{C}$  and  $^{31}\text{P}$  NMR spectrum of AA-DOPO (solvent: DMSO- $d_6$ ).

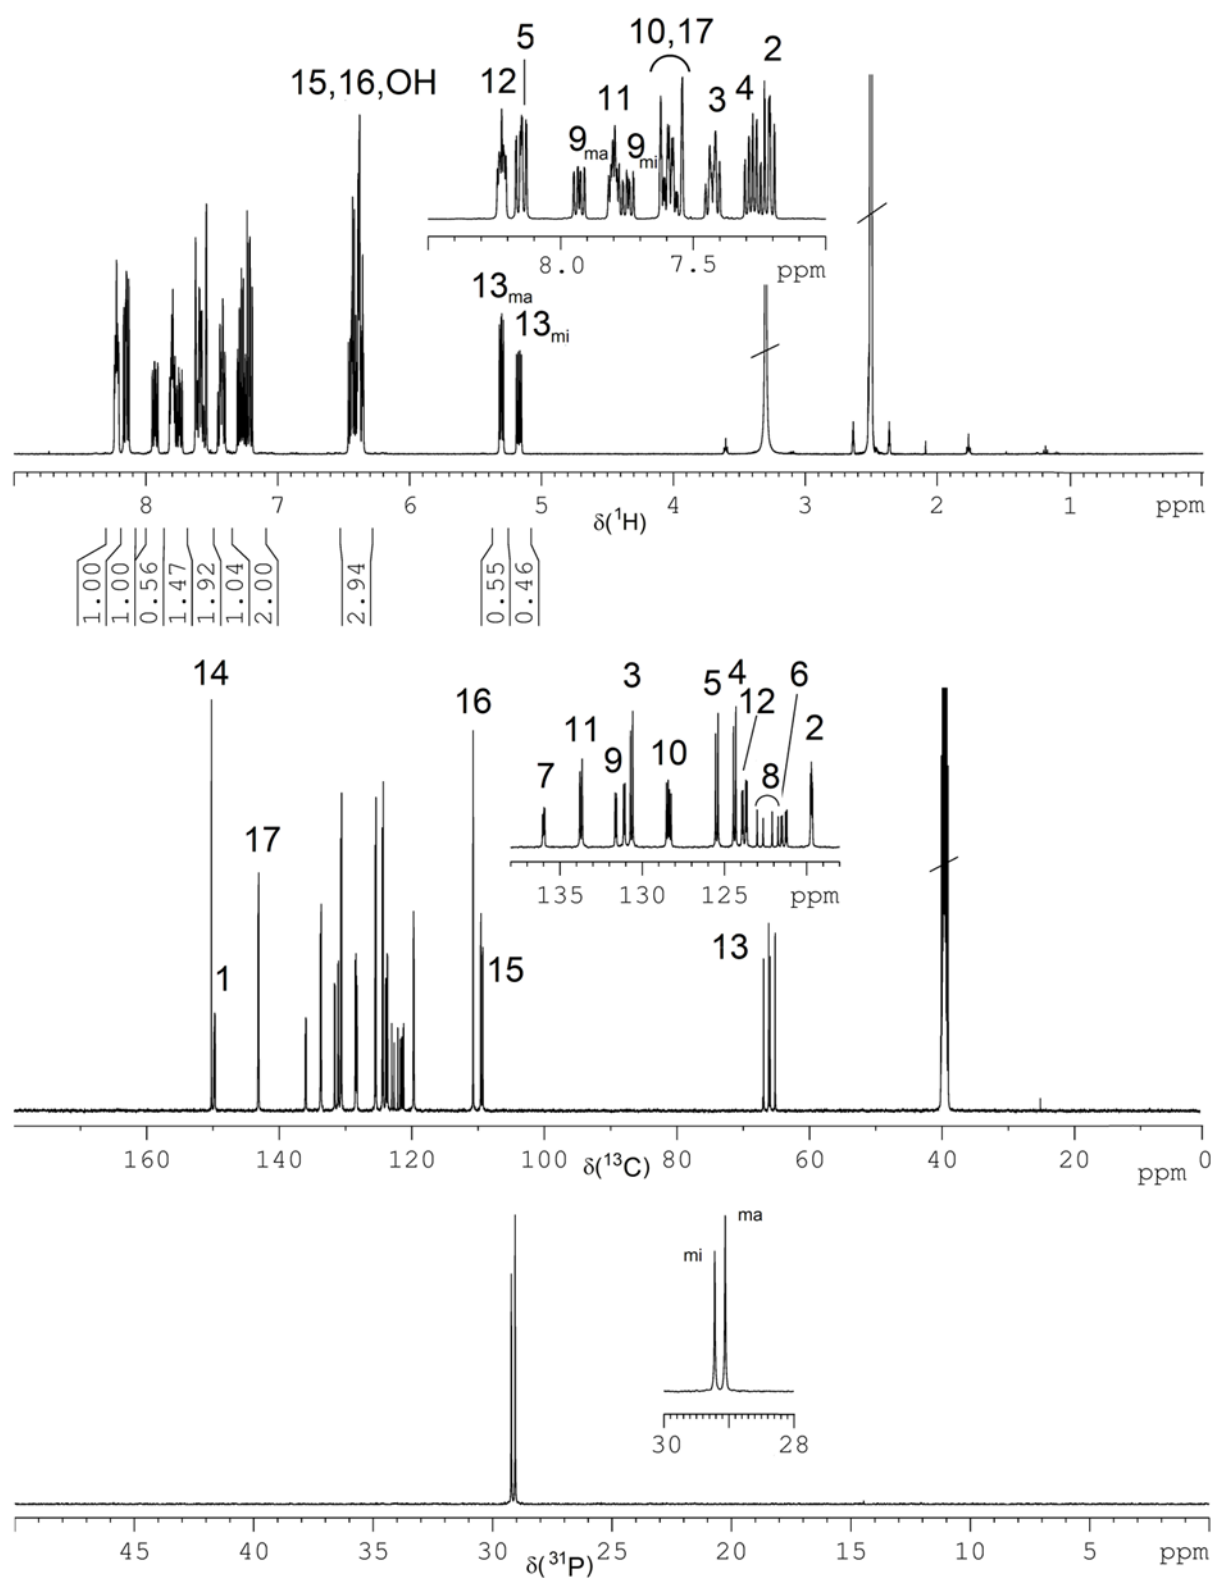

**Figure S21.** <sup>1</sup>H, <sup>13</sup>C and <sup>31</sup>P NMR spectrum of FU-DOPO (solvent: DMSO-d<sub>6</sub>).

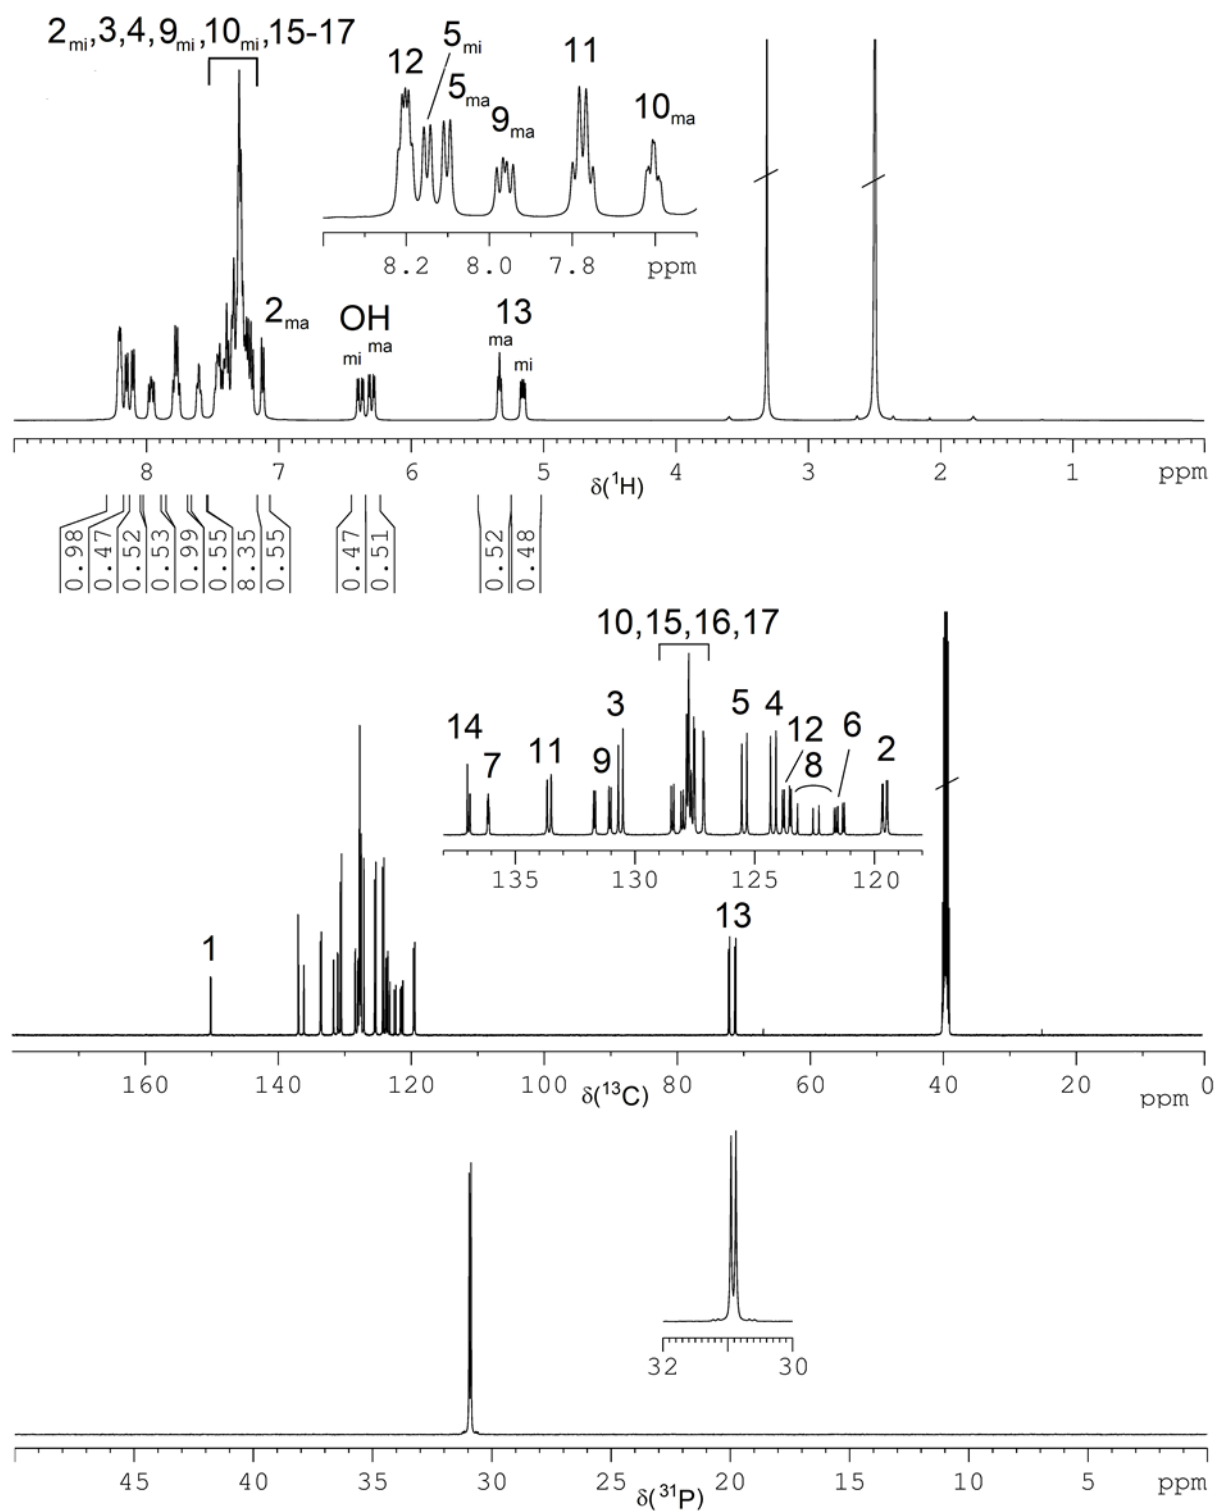

**Figure S22.**  $^1\text{H}$ ,  $^{13}\text{C}$  and  $^{31}\text{P}$  NMR spectrum of **BA-DOPO** (solvent:  $\text{DMSO-d}_6$ ).

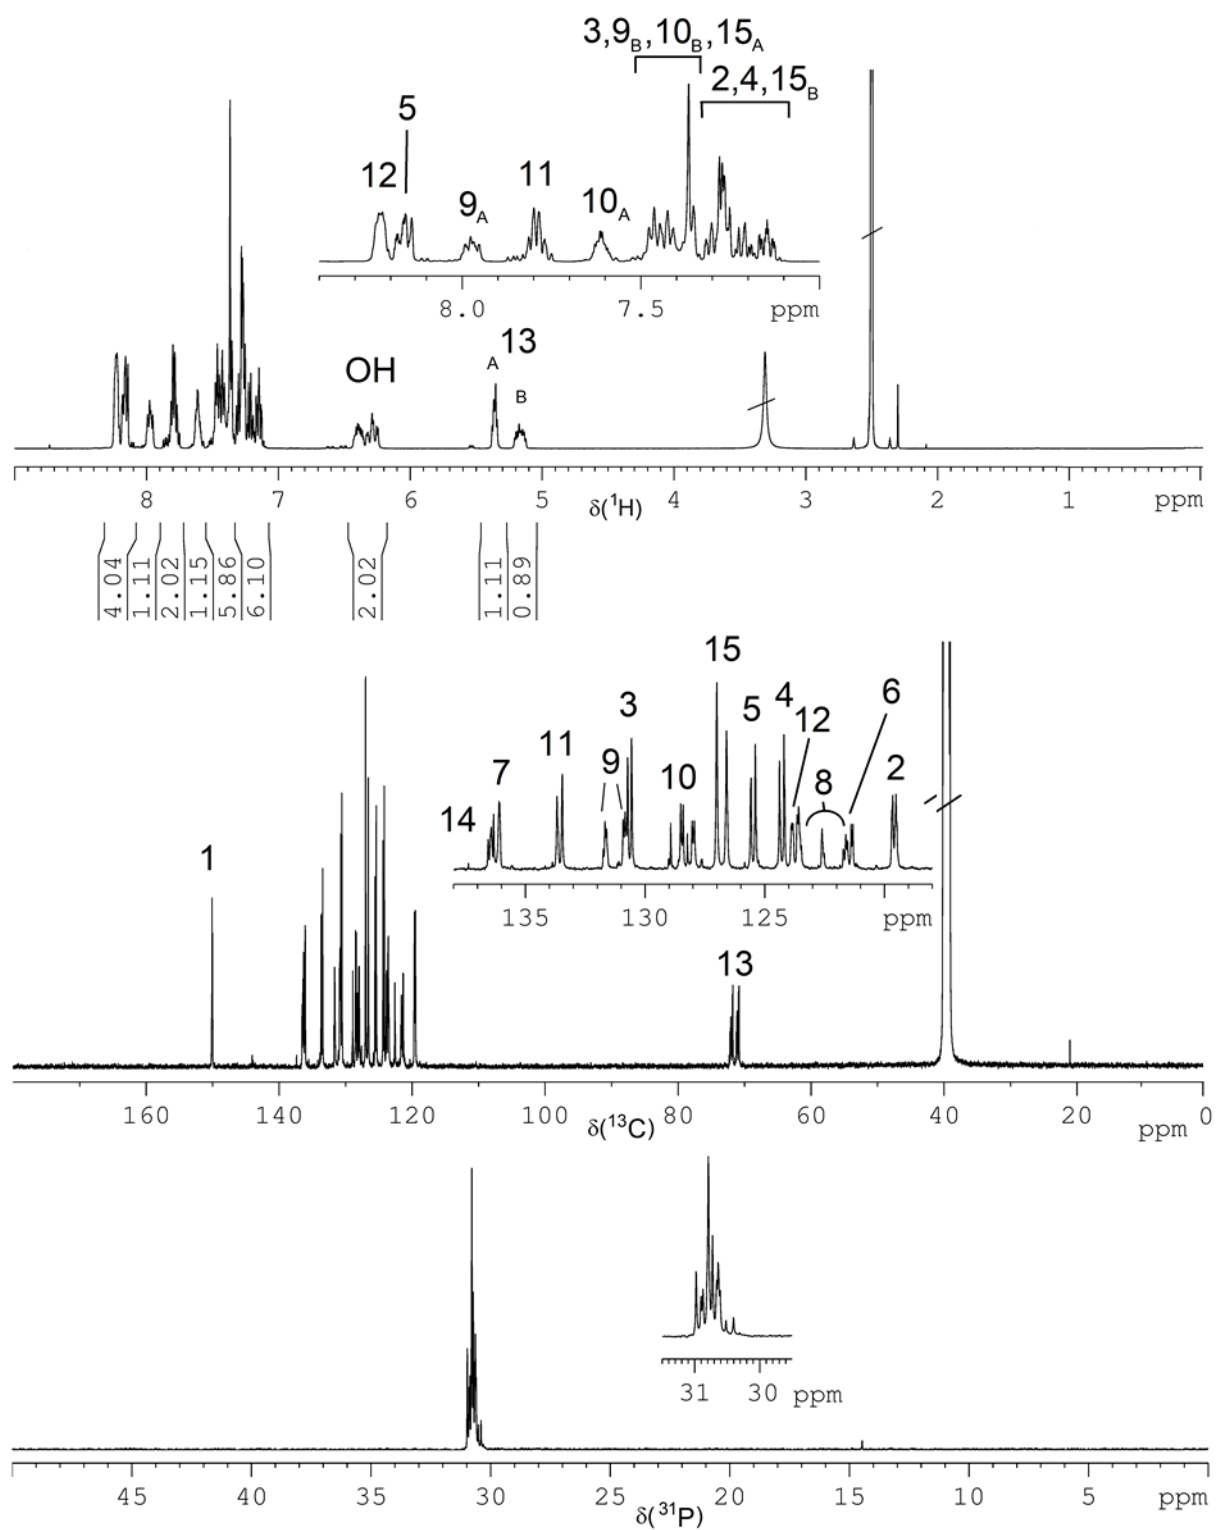

**Figure S23.**  $^1\text{H}$ ,  $^{13}\text{C}$  and  $^{31}\text{P}$  NMR spectrum of TA-DOPO (solvent:  $\text{DMSO-d}_6$ ).

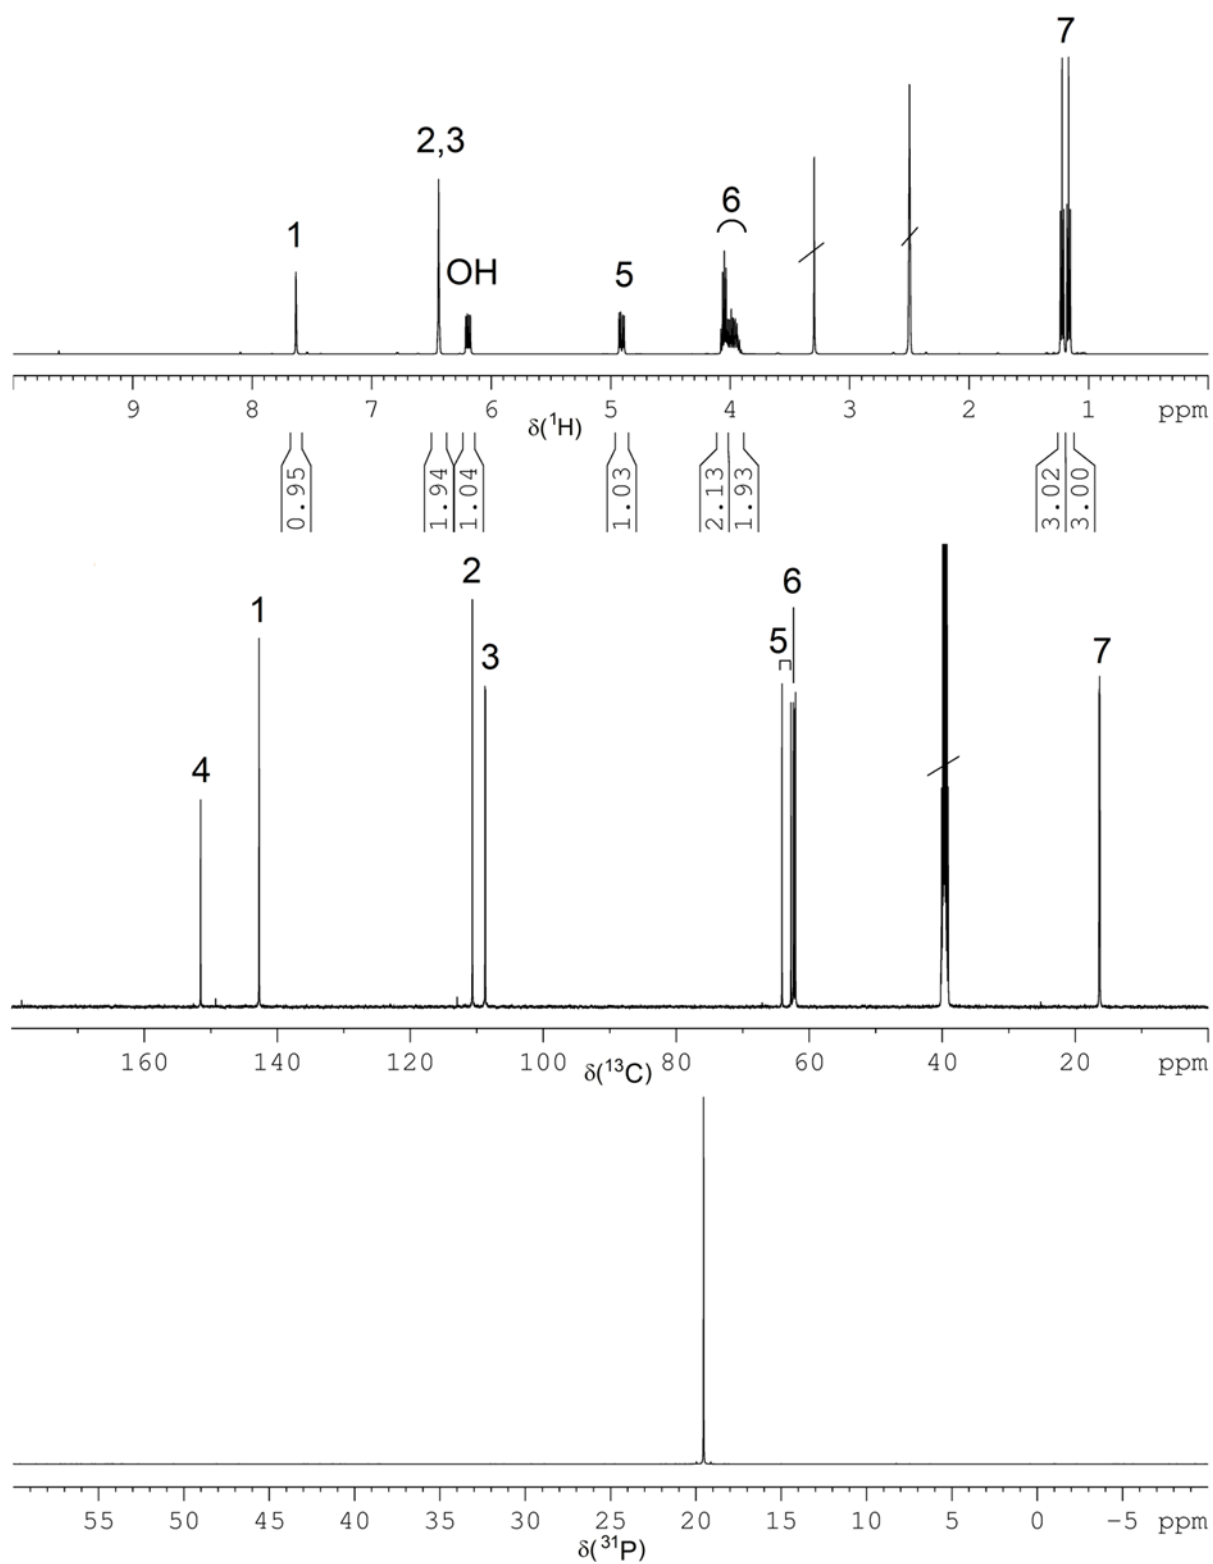

**Figure S24.** <sup>1</sup>H, <sup>13</sup>C and <sup>31</sup>P NMR spectrum of FU-EP (solvent: DMSO-d<sub>6</sub>).

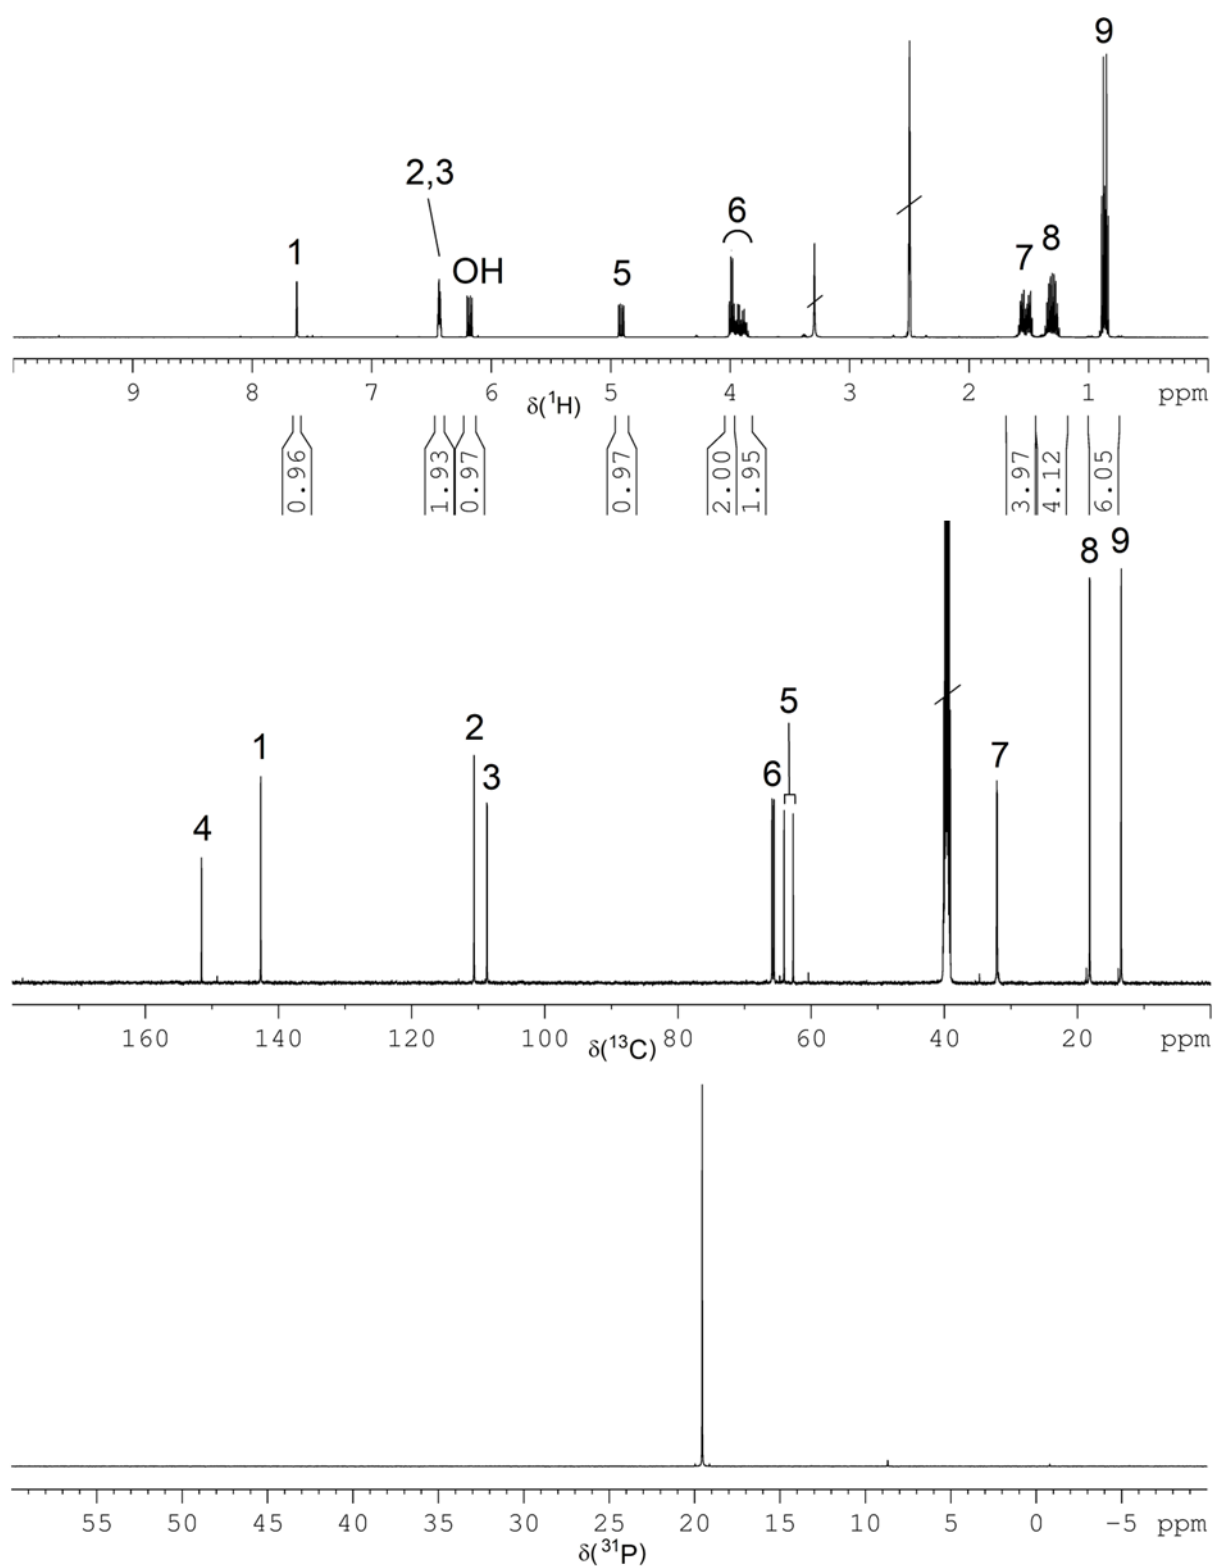

**Figure S25.** <sup>1</sup>H, <sup>13</sup>C and <sup>31</sup>P NMR spectrum of FU-BP (solvent: DMSO-d<sub>6</sub>).

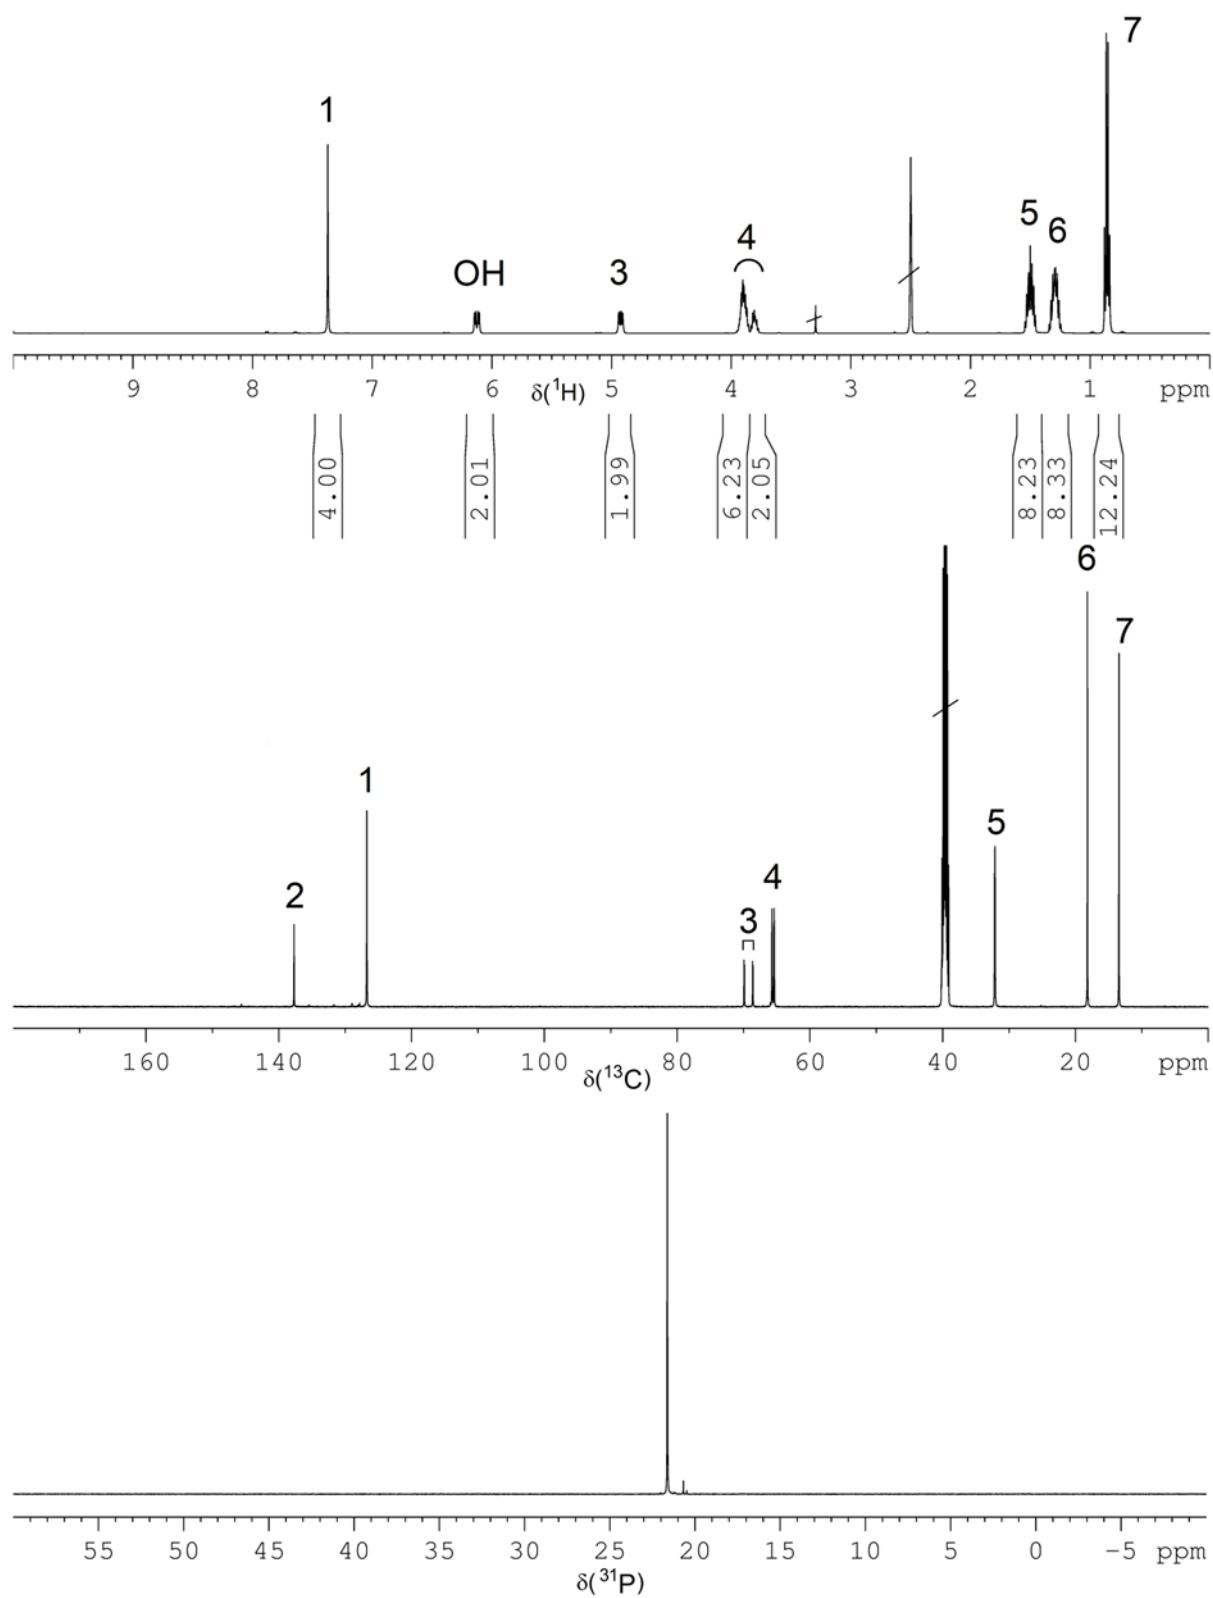

**Figure S26.** <sup>1</sup>H, <sup>13</sup>C and <sup>31</sup>P NMR spectrum of TA-BP (solvent: DMSO-d<sub>6</sub>).

### 3. PIR Foam compositions studied

**Table S1.** PIR foam compositions studied.

| Foam             | TEGOSTAB B8421 | Emulsogen TS100 | TEP | PEG 400 | Catalyst | PEP50AD | Pentane | Desmodur 44V70L | Mass of FR |
|------------------|----------------|-----------------|-----|---------|----------|---------|---------|-----------------|------------|
|                  | [g]            | [g]             | [g] | [g]     | [g]      | [g]     | [g]     | [g]             | [g]        |
| FA-BP/TEP-1.0P   | 4.0            | 2.0             | 5.0 | 16.0    | 2.5      | 53.0    | 15.0    | 151.8           | 13.0       |
| FA-BP-0.7P       | 4.0            | 2.0             | -   | 16.0    | 2.5      | 53.0    | 15.0    | 151.8           | 13.0       |
| FA-BPPO/TEP-1.0P | 4.0            | 2.0             | 5.0 | 16.0    | 2.5      | 53.0    | 15.0    | 151.8           | 15.2       |
| FA-BPPO-0.7P     | 4.0            | 2.0             | -   | 16.0    | 2.5      | 53.0    | 15.0    | 151.8           | 15.2       |
| AA-BPPO/TEP-1.0P | 4.0            | 2.0             | 5.0 | 16.0    | 2.5      | 53.0    | 15.0    | 151.8           | 16.0       |
| FU-BPPO/TEP-1.0P | 4.0            | 2.0             | 5.0 | 16.0    | 2.5      | 53.0    | 15.0    | 151.8           | 19.5       |
| FU-BPPO-0.7P     | 4.0            | 2.0             | -   | 16.0    | 2.5      | 53.0    | 15.0    | 151.8           | 19.5       |
| BA-BPPO/TEP-1.0P | 4.0            | 2.0             | 5.0 | 16.0    | 2.5      | 53.0    | 15.0    | 151.8           | 20.0       |
| BA-BPPO-0.7P     | 4.0            | 2.0             | -   | 16.0    | 2.5      | 53.0    | 15.0    | 151.8           | 20.0       |
| TA-BPPO/TEP-1.0P | 4.0            | 2.0             | 5.0 | 16.0    | 2.5      | 53.0    | 15.0    | 151.8           | 17.5       |
| TA-BPPO-0.7P     | 4.0            | 2.0             | -   | 16.0    | 2.5      | 53.0    | 15.0    | 151.8           | 17.5       |
| FA-DOPO/TEP-1.0P | 4.0            | 2.0             | 5.0 | 16.0    | 2.5      | 53.0    | 15.0    | 151.8           | 14.2       |
| FA-BPPO-0.7P     | 4.0            | 2.0             | -   | 16.0    | 2.5      | 53.0    | 15.0    | 151.8           | 15.2       |
| AA-DOPO/TEP-1.0P | 4.0            | 2.0             | 5.0 | 16.0    | 2.5      | 53.0    | 15.0    | 151.8           | 15.0       |
| FU-DOPO/TEP-1.0P | 4.0            | 2.0             | 5.0 | 16.0    | 2.5      | 53.0    | 15.0    | 151.8           | 18.5       |
| FU-DOPO-0.7P     | 4.0            | 2.0             | -   | 16.0    | 2.5      | 53.0    | 15.0    | 151.8           | 18.5       |
| BA-DOPO/TEP-1.0P | 4.0            | 2.0             | 5.0 | 16.0    | 2.5      | 53.0    | 15.0    | 151.8           | 19.0       |
| BA-DOPO-0.7P     | 4.0            | 2.0             | -   | 16.0    | 2.5      | 53.0    | 15.0    | 151.8           | 19.0       |
| TA-DOPO/TEP-1.0P | 4.0            | 2.0             | 5.0 | 16.0    | 2.5      | 53.0    | 15.0    | 151.8           | 16.5       |
| TA-DOPO-0.7P     | 4.0            | 2.0             |     | 16.0    | 2.5      | 53.0    | 15.0    | 151.8           | 16.5       |
| FU-EP-0.7P       | 4.0            | 2.0             |     | 16.0    | 2.5      | 53.0    | 15.0    | 151.8           | 13.5       |
| FU-EP/TEP-1.0P   | 4.0            | 2.0             | 5.0 | 16.0    | 2.5      | 53.0    | 15.0    | 151.8           | 13.5       |
| FU-BP-0.7P       | 4.0            | 2.0             |     | 16.0    | 2.5      | 53.0    | 15.0    | 151.8           | 17.0       |
| FU-BP/TEP-1.0P   | 4.0            | 2.0             | 5.0 | 16.0    | 2.5      | 53.0    | 15.0    | 151.8           | 17.0       |
| TA-BP-0.7P       | 4.0            | 2.0             |     | 16.0    | 2.5      | 53.0    | 15.0    | 151.8           | 15.0       |
| TA-BP/TEP-1.0P   | 4.0            | 2.0             | 5.0 | 16.0    | 2.5      | 53.0    | 15.0    | 151.8           | 15.0       |

#### 4. Compression strength of PIR foams with phospho-aldol adducts

**Table S2.** Compression strengths of the PIR foams with phospho-aldol adducts.

| PIR Foam         | F <sub>max</sub> |
|------------------|------------------|
|                  | [kPa]            |
| FA-BP-0.7P       | 240              |
| FA-BP/TEP-1.0P   | 258              |
| FA-BPPO-0.7P     | 246              |
| FA-BPPO/TEP-1.0P | 337              |
| AA-BPPO/TEP-1.0P | 250              |
| FU-BPPO-0.7P     | 290              |
| FU-BPPO/TEP-1.0P | 297              |
| BA-BPPO-0.7P     | 263              |
| BA-BPPO/TEP-1.0P | 267              |
| TA-BPPO-0.7P     | 250              |
| TA-BPPO/TEP-1.0P | 390              |
| FA-DOPO/TEP-1.0P | 219              |
| AA-DOPO/TEP-1.0P | 328              |
| FU-DOPO-0.7P     | 322              |
| FU-DOPO/TEP-1.0P | 252              |
| BA-DOPO-0.7P     | 250              |
| BA-DOPO/TEP-1.0P | 257              |
| TA-DOPO-0.7P     | 254              |
| TA-DOPO/TEP-1.0P | 224              |
| FU-EP-0.7P       | 226              |
| FU-EP/TEP-1.0P   | 275              |
| FU-BP-0.7P       | 285              |
| FU-BP/TEP-1.0P   | 277              |
| TA-BP-0.7P       | 320              |
| TA-BP/TEP-1.0P   | 356              |

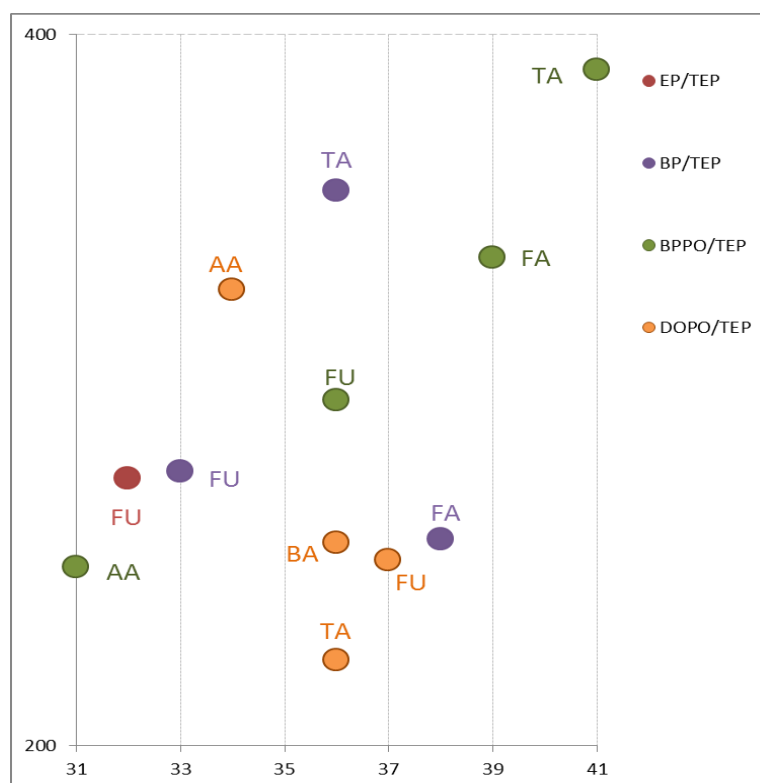

**Figure S27.** Dependence of the compression strength on the density of selected IR foams with different FR additives.

## 5. Thermal decomposition of the PIR foams studied by TGA

**Table S3.** TGA data of the PIR foams studied (TGA under nitrogen with a scan rate of 10 K/min).

| FR additive/<br>foam name-P content<br>[wt.-%] | Decomposition step<br>$T_{\max, \text{dec}}$ /Mass loss at $T_{\max, \text{dec}}$<br>[°C]/[wt.-%] | Residue at<br>800 °C<br>[wt.-%] |
|------------------------------------------------|---------------------------------------------------------------------------------------------------|---------------------------------|
| 0 (PIR-0)                                      | <b>1. 326</b>                                                                                     | 26.6                            |
| TEP-0.3                                        | 1. 219//14.9<br><b>2. S285/325//36.5</b><br>3. 405/S463//20.3<br>4. 575//5.2                      | 21.1                            |
| TPP-0.7                                        | 1. 225//9.1<br><b>2. 332//38.3</b><br>3. 395//9.3<br>4. S490/S480//9.0                            | 29.3                            |
| TPP/TEP-1.0                                    | <b>1. 280/340//39.2</b><br>2. 410/S460//21.1<br>3. S560//9.6                                      | 29.8                            |
| EA-BPPO-0.7                                    | 1. S150/S280/ <b>330</b> //46.4<br>2. 410/S480/S575//26.7                                         | 24.6                            |
| EA-BPPO/TEP-1.0                                | <b>1. 321</b>                                                                                     | 22.6                            |
| PA-BPPO/TEP-1.0                                | <b>1. 320</b>                                                                                     | 34.6                            |
| DMI-BPPO/TEP-1.0                               | 1. 180//5.3<br>2. 285//16.0<br><b>3. 329//27.2</b><br>4. 422//10.4<br>5. 465//9.7                 | 23.3                            |
| DMI-DOPO/TEP-1.0                               | 1. 175//4.2<br><b>2. S290/332//39.7</b><br><b>3. 427/S490/S570//29.7</b>                          | 23.9                            |
| FA-BPPO-0.7                                    | <b>1. S250/S295/316//35.6</b><br>2. 403//17.1<br>3. 524/s570//12.3                                | 29.7                            |
| FA-BPPO/TEP-1.0                                | <b>1. S262/S295/317//35.8</b><br>2. 381//21.1<br>3. 515//7.7                                      | 29.0                            |

|                 |    |                       |      |
|-----------------|----|-----------------------|------|
| BA-BPPO-0.7     | 1. | 242//8.0              |      |
|                 | 2. | <b>S295/315//26.1</b> |      |
|                 | 3. | 500//15.3             |      |
|                 | 4. | 515//15.1             | 31.4 |
| BA-BPPO/TEP-1.0 | 1. | S185//3.2             | 30.8 |
|                 | 2. | 245//7.8              |      |
|                 | 3. | <b>S300/317//25.5</b> |      |
|                 | 4. | 400//14.6             |      |
|                 | 5. | 525//15.2             |      |
| BA-DOPO-0.7     | 1. | S150/190//2.6         |      |
|                 | 2. | S235//4.2             |      |
|                 | 3. | <b>S290/320//26.5</b> |      |
|                 | 4. | <b>S375/425//31.3</b> | 25.4 |
|                 | 5. | S545//7.8             |      |
| BA-DOPO/TEP-1.0 | 1. | S130/192//3.4         |      |
|                 | 2. | S240//4.3             |      |
|                 | 3. | <b>S295/320//26.2</b> |      |
|                 | 4. | <b>427//30.1</b>      | 25.0 |
|                 | 5. | S550//8.2             |      |
| FU-BPPO-0.7     | 1. | 185//1.8              |      |
|                 | 2. | 240//3.5              |      |
|                 | 3. | <b>S300/320//29.7</b> |      |
|                 | 4. | 404//11.8             | 34.0 |
|                 | 5. | 522//16.3             |      |
| FU-BPPO/TEP-1.0 | 1. | S125/185//1.8         |      |
|                 | 2. | 240//3.5              |      |
|                 | 3. | S300/320//29.7        |      |
|                 | 4. | 405//11.8             | 34.6 |
|                 | 5. | 522//16.3             |      |
| FU-DOPO-0.7     | 1. | 190//2.4              |      |
|                 | 2. | S235/S295/320//30.6   | 25.4 |
|                 | 3. | 423//30.8             |      |
|                 | 4. | S550//8.2             |      |
| FU-DOPO/TEP-1.0 | 1. | 192//2.5              |      |
|                 | 2. | S240//4.2             |      |
|                 | 3. | <b>S300/322//26.5</b> |      |
|                 | 4. | <b>418//29.1</b>      | 25.6 |
|                 | 5. | S555//8.3             |      |
| TA-BPPO-0.7     | 1. | 233/6.1               |      |
|                 | 2. | <b>325/29.3</b>       |      |
|                 | 3. | 405/11.8              |      |
|                 | 4. | 515/17.8              | 31.5 |

---

|                  |    |                       |      |
|------------------|----|-----------------------|------|
| TA-BPPO/TEP-1.0P | 1. | 235//6.3              |      |
|                  | 2. | <b>S300/320//29.4</b> |      |
|                  | 3. | 404//11.8             |      |
|                  | 4. | 518//17.5             | 32.9 |
| TA-DOPO-0.7P     | 1. | 232/4.1               |      |
|                  | 2. | <b>322/29.5</b>       |      |
|                  | 3. | <b>422/S540/37.1</b>  | 26.7 |
| TA-DOPO/TEP-1.0P | 1. | 240//6.7              |      |
|                  | 2. | <b>S295/322//25.6</b> |      |
|                  | 3. | <b>431/30.2</b>       |      |
|                  | 4. | S550//8.7             |      |
| TA-BP-0.7P       | 1. | 236//9.1              |      |
|                  | 2. | <b>S275/324//31.9</b> |      |
|                  | 3. | 420//10.1             |      |
|                  | 4. | 470/S535//17.8        | 27.8 |
| TA-BP/TEP-1.0P   | 1. | 232//7.1              |      |
|                  | 2. | <b>S295/324//31.9</b> |      |
|                  | 3. | 422/S475//21.7        |      |
|                  | 4. | S560//5.6             | 27.4 |
| FU-BP-0.7        | 1. | S116//7.6             |      |
|                  | 2. | 230//26.4             |      |
|                  | 3. | S293//8.5             |      |
|                  | 4. | <b>319//19.7</b>      |      |
|                  | 5. | 413//3.6              | 33.7 |
| FU-BP/TEP-1.0    | 1. | 228//9.0              |      |
|                  | 2. | 292//5.2              |      |
|                  | 3. | <b>318//10.1</b>      |      |
|                  | 4. | <b>S391//17.3</b>     |      |
|                  | 5. | 412//2.3              | 34.5 |
| FA-BP-0.7        | 1. | 185//4.8              |      |
|                  | 2. | <b>S240/325//37.5</b> |      |
|                  | 3. | 415//10.4             |      |
|                  | 4. | 465/S520//16.1        | 28.9 |
| FA-BP/TEP-1.0    | 1. | S170//1.7             |      |
|                  | 2. | <b>S260/321//40.7</b> |      |
|                  | 3. | 410/S465//16.9        |      |
|                  | 4. | 520//8.4              | 30.3 |

BA: benzaldehyde; BP: butylphosphonate; BuA: butylacrylate; EA: ethylacrylate; DMI: dimethylitaconate; FA: formaldehyde; FU: furfurylaldehyde; PA: phenyl acrylate; TA: terephthalaldehyde.

S: shoulder

Bold black: main decomposition maximum caused by PIR decomposition

Bold blue: main decomposition maximum caused by DOPO decomposition

**Table S4.** Summary of pyrolysis-GC/MS data obtained for PIR foams with phospho-aldol adducts. Results with phospho-Michael adducts have been published before in. Selected samples are given for comparison.

| PIR foam             | T<br>[°C] | TEP  | DBM  | Deca<br>nal | Bu-<br>OH | DEG  | DBP   | Dioxa-<br>ne | EG-<br>vinyl-<br>ether | PA/<br>PAA<br>deriv. | MDI   | TEG           | 2,2'-BP<br>diol | Anili-<br>ne<br>deriv.       | Glycol | Furfur-<br>al | TBP   |
|----------------------|-----------|------|------|-------------|-----------|------|-------|--------------|------------------------|----------------------|-------|---------------|-----------------|------------------------------|--------|---------------|-------|
| Retention time [min] |           | 8.41 | 7.55 | 9.47        | 2.37      | 6.25 | 11.02 | 2.72         | 2.85                   | 10.87<br>16.59       | 18.24 | 9.71<br>10.55 | 14.49           | 6.48<br>7.70<br>7.82<br>8.55 | 2.56   | 4.24<br>4.48  | 14.27 |
| PIR-0                | 327       |      |      |             |           | +    |       |              |                        |                      |       |               |                 | +                            |        |               |       |
|                      | 468       |      |      |             |           | +    |       |              |                        | +                    |       |               |                 | +                            |        |               |       |
| TPP/TEP-1.0          | 215       | +    |      |             |           |      |       |              |                        |                      |       |               |                 |                              |        |               |       |
|                      | 324       |      |      |             |           | +    |       |              |                        |                      |       |               |                 |                              |        |               | +     |
|                      | 465       |      |      |             |           | +    |       |              |                        |                      |       |               |                 | +                            |        |               |       |
| EA-BPPO/TEP-1.0      | 130       | +    |      |             |           |      |       |              |                        |                      |       |               |                 |                              |        |               |       |
|                      | 245       | +    |      |             |           |      |       |              |                        |                      |       |               |                 |                              |        |               |       |
|                      | 465       |      |      |             |           |      |       |              |                        | +                    |       |               |                 | +                            |        |               |       |
| FA-BP/TEP-1.0        | 179       | +    |      |             |           |      |       |              |                        |                      |       |               |                 |                              |        |               |       |
|                      | 324       |      |      |             | +         | +    | +     |              |                        | +                    |       |               |                 |                              |        |               |       |
|                      | 465       |      |      |             |           | +    |       | +            | +                      | +                    |       | +             |                 |                              |        |               |       |
| FA-BPPO-0.7          | 179       | +    | +    |             |           |      |       |              |                        |                      |       |               |                 |                              |        |               |       |
|                      | 324       |      |      |             | +         |      | +     |              |                        | +                    |       |               |                 |                              |        |               | +     |
|                      | 465       |      |      |             |           |      |       | +            |                        |                      |       |               |                 | +                            |        |               |       |
| FA-BPPO/TEP-1.0      | 295       | +    |      |             |           |      |       |              |                        | +                    |       |               |                 |                              |        |               |       |
|                      | 381       |      |      |             |           | +    |       | +            |                        | +                    | +     | +             | +               |                              |        |               |       |
|                      | 527       |      |      |             |           |      |       | +            |                        |                      |       |               |                 | +                            |        |               |       |
| FU-BPPO/TEP-1.0      | 183       |      |      |             |           |      |       |              |                        |                      |       |               |                 |                              | +      |               |       |
|                      | 321       | +    | +    |             |           |      |       | +            |                        | +                    |       |               |                 |                              | +      |               |       |
|                      | 405       |      |      |             |           |      |       | +            |                        | +                    |       | +             | +               | +                            |        | +             |       |
|                      | 522       |      |      |             |           | +    |       | +            |                        |                      |       |               |                 | +                            |        |               |       |
| FU-DOPO/TEP-1.0      | 191       | +    |      |             |           |      |       |              |                        |                      |       |               |                 |                              |        |               |       |
|                      | 318       | +    |      |             |           |      |       |              |                        |                      |       |               |                 |                              |        |               |       |
|                      | 423       |      |      |             |           | +    |       |              | +                      |                      |       | +             |                 | +                            |        |               |       |

|                 |     |   |  |  |   |    |   |   |  |   |  |   |   |   |   |   |   |
|-----------------|-----|---|--|--|---|----|---|---|--|---|--|---|---|---|---|---|---|
| TA-BPPO/TEP-1.0 | 232 |   |  |  |   |    |   |   |  |   |  |   |   |   | + |   |   |
|                 | 323 | + |  |  |   | +  |   |   |  | + |  |   | + |   |   |   |   |
|                 | 403 |   |  |  |   | +  |   | + |  |   |  |   | + |   |   |   |   |
|                 | 518 |   |  |  |   | +  |   |   |  | + |  |   | + | + |   | + |   |
| TA-DOPO/TEP-1.0 | 191 | + |  |  |   |    |   |   |  |   |  |   |   |   | + | + |   |
|                 | 318 | + |  |  | + | ^+ |   |   |  | + |  |   |   |   |   | + |   |
|                 | 423 |   |  |  | + |    | + | + |  | + |  | + |   | + | + |   |   |
| TA-BP/TEP-1.0   | 236 | + |  |  |   |    | + |   |  | + |  |   |   |   |   |   | + |
|                 | 322 | + |  |  | + |    | + |   |  | + |  |   |   |   |   |   | + |
|                 | 477 |   |  |  |   |    |   | + |  | + |  |   |   | + |   |   |   |
| FU-BP/TEP-1.0   | 230 | + |  |  |   |    | + | + |  | + |  |   |   |   |   | + | + |
|                 | 318 | + |  |  | + |    |   | + |  |   |  |   |   |   |   | + |   |
|                 | 412 |   |  |  |   | +  |   | + |  |   |  |   |   | + |   |   |   |
|                 | 534 |   |  |  |   | +  |   | + |  |   |  |   |   | + |   |   |   |

+

Py-GC/MS: TEP: triethylphosphate; DBM: dibutoxymethane; Bu-OH: butanol; DEG: diethylene glycol; DBP: dibutylphosphite; EG-vinylether: ethylene glycol vinyl ether; PAA: phthalic acid or phthalic anhydride; MDI: m,ethylenediisocyanate; TEG: triethylene glycol; 2,2'-BP: 2,2'-biphenyl; TBP: tributylphosphate.

Pyrolyzer Pyroprobe 5000 (CDS Analytical, Inc., Oxford, PA, USA) with platinum filament, interface CDS1500 (CDS Analytical, Inc., Oxford, PA, USA), GC7890A (Agilent Technologies, Santa Clara, Ca, USA), with an inlet temperature of 280 °C, an oven temperature of 50 °C/2 min, 12 K/min to 280 °C, GC column HP-5MS (30 cm·250 µm inner diameter and 0.25 µm layer thickness; gas flow: helium, 1 mL/min; mass spectrometry: Agilent MSD (mass-selective detector) 5975C inert XL EI/CI (Agilent Technologies, Santa Clara, Ca, USA) at 70 eV in the scan range of 15–550).

## 6 Cone calorimeter results: MARHE vs. char plots

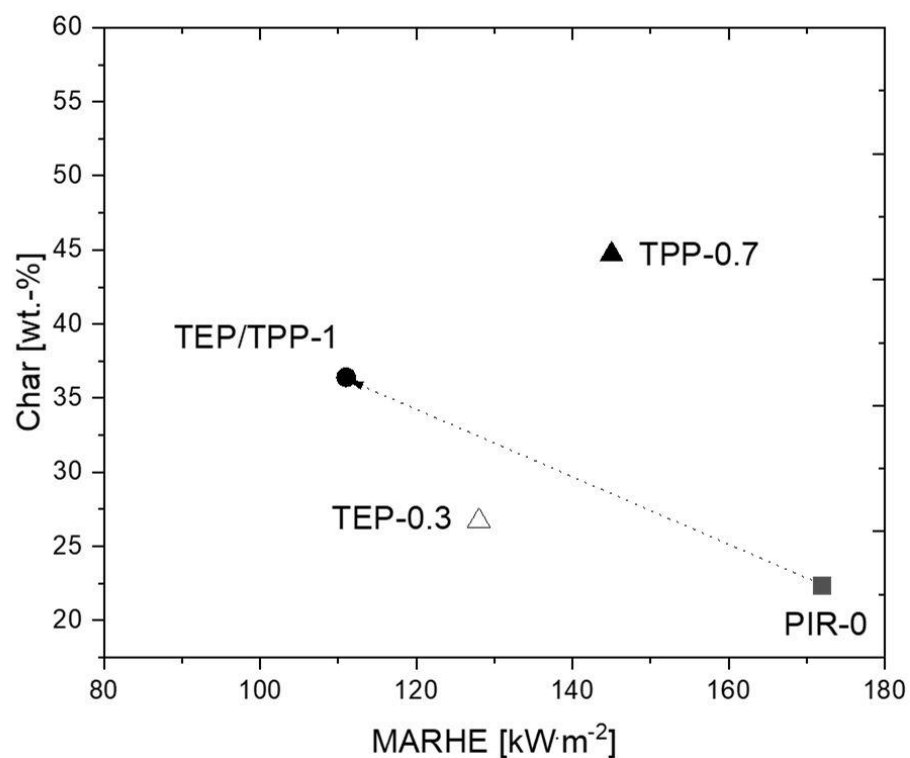

Figure S28. MARHE vs. char plots for the control and state-of-the-art PIR foams studied.

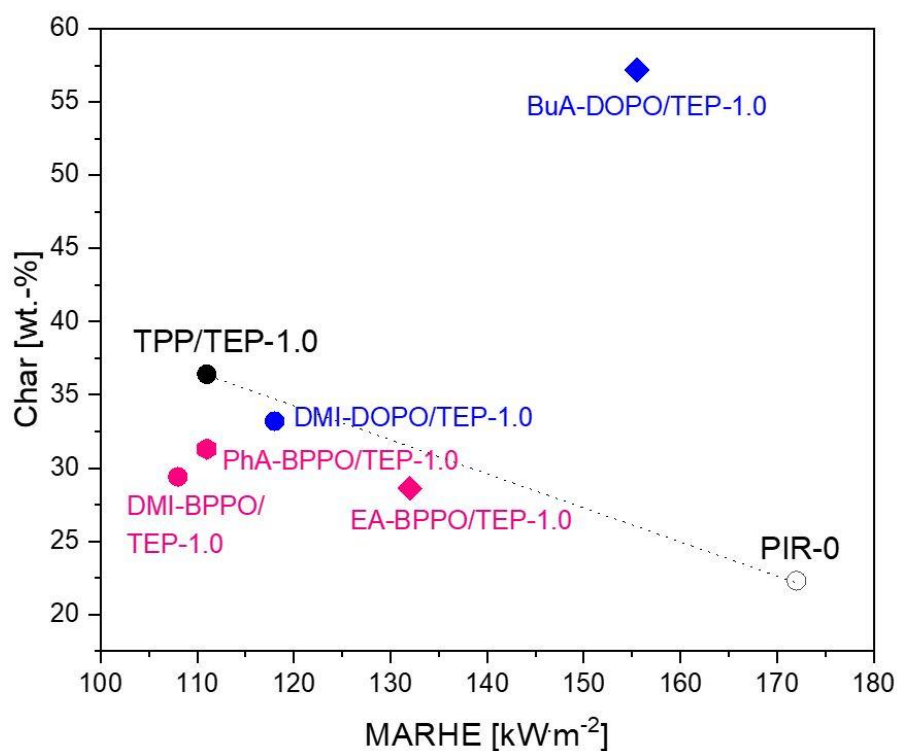

Figure S29. MARHE vs. residue plot for PIR foams with non-reactive BPPO additives (PhA: phenylacrylate; DMI: dimethylitaconate; EA: ethylacrylate, BuA: butylacrylate).

## Reference

- 1 J. Lenz, D. Pospiech, M. Paven, R. W. Albach, M. Günther, B. Schartel and B. Voit. Improving the flame retardance of polyisocyanurate foams by dibenzo [d, f][1, 3, 2] dioxaphosphepine 6-oxide-containing additives. *Polymers* **2019**, *11*, 1242.
